1 **Prophylactic TLR9 stimulation reduces brain metastasis through microglia**  
2 **activation**

3

4 Amit Benbenishty<sup>1,2,3</sup>, Meital Gadrach<sup>3,4</sup>, Azzurra Cottarelli<sup>5</sup>, Alisa Lubart<sup>2,3</sup>, David Kain<sup>2</sup>,  
5 Malak Amer<sup>6</sup>, Lee Shaashua<sup>1</sup>, Ariella Glasner<sup>7</sup>, Neta Erez<sup>6</sup>, Dritan Agalliu<sup>5</sup>, Lior Mayo<sup>3,4</sup>,  
6 Shamgar Ben-Eliyahu<sup>1,3,\*</sup> and Pablo Blinder<sup>2,3,\*</sup>

7

8 <sup>1</sup>School of Psychological Sciences, Tel Aviv University, Tel Aviv, Israel

9 <sup>2</sup>Neurobiology Department, Tel Aviv University, Tel Aviv, Israel

10 <sup>3</sup>Sagol School of Neuroscience, Tel Aviv University, Tel Aviv, Israel

11 <sup>4</sup>School for Molecular Cell Biology & Biotechnology, Tel Aviv University, Tel Aviv, Israel

12 <sup>5</sup>Department of Neurology, Columbia University Medical Center, New York, New York, USA

13 <sup>6</sup>Department of Pathology, Sackler School of Medicine, Tel Aviv University, Tel Aviv, Israel

14 <sup>7</sup>The Lautenberg Centre for General and Tumor Immunology, The Hebrew University  
15 Hadassah Medical School, Jerusalem, Israel

16

17 \* Co-corresponding authors: [shamgar@post.tau.ac.il](mailto:shamgar@post.tau.ac.il), [pb@tauex.tau.ac.il](mailto:pb@tauex.tau.ac.il) (lead contact)

18

19

20

21

## 22 **Abstract**

23 Brain metastases are prevalent in various types of cancer, and are often terminal given low  
24 efficacy of available therapies. Therefore, preventing them is of utmost clinical relevance  
25 and prophylactic treatments are perhaps the most efficient strategy. Here, we show that  
26 systemic prophylactic administration of a TLR9 agonist, CpG-C, is effective against brain  
27 metastases. Acute and chronic systemic administration of CpG-C reduced tumor cell  
28 seeding and growth in the brain in three tumor models in mice, including metastasis of  
29 human and mouse lung cancer, and spontaneous melanoma-derived brain metastasis.  
30 Studying mechanisms underlying the therapeutic effects of CpG-C, we found that in the  
31 brain, unlike in the periphery, NK cells and monocytes are not involved in controlling  
32 metastasis. Next, we demonstrated that the systemically administered CpG-C is taken up by  
33 endothelial cells, astrocytes, and microglia, without affecting blood-brain barrier integrity and  
34 tumor brain extravasation. *In vitro* assays pointed to microglia, but not astrocytes, as  
35 mediators of CpG-C effects through increased tumor killing and phagocytosis, mediated by  
36 direct microglia-tumor contact. *In vivo*, CpG-C-activated microglia displayed elevated mRNA  
37 expression levels of apoptosis-inducing and phagocytosis-related genes. Intravital imaging  
38 showed that CpG-C-activated microglia cells contact, kill, and phagocytize tumor cells in the  
39 early stages of tumor brain invasion more than non-activated microglia. Blocking *in vivo*  
40 activation of microglia with minocycline, and depletion of microglia with a colony-stimulating  
41 factor 1 inhibitor, indicated that microglia mediate the anti-tumor effects of CpG-C. Overall,  
42 the results suggest prophylactic CpG-C treatment as a new intervention against brain  
43 metastasis, through an essential activation of microglia.

44

## 45 **Summary**

46 Brain metastases are prevalent and often terminal. Thus, reducing their occurrence could  
47 markedly improve cancer outcome. We show that systemic prophylactic and perioperative  
48 administration of a TLR9 agonist, CpG-C, reduced metastatic growth in experimental and  
49 spontaneous brain metastasis models, employing mouse and human tumors. CpG-C was  
50 taken up in the brain, without affecting blood-brain barrier integrity and tumor extravasation.  
51 *In vitro* assays, imaging flow cytometry, and intravital imaging pointed to microglia as  
52 mediators of CpG-C effects through contact-dependent tumor killing and phagocytosis;  
53 corresponding with *in vivo* mRNA profile. *In vivo* depletion studies proved that microglia, but  
54 not NK cells or monocytes, mediated the beneficial effects of CpG-C; Also hindered by  
55 blocking microglial activation. In-toto, perioperative treatment with CpG-C should be  
56 considered clinically relevant.

57

## 58 **Significance**



59 Preventing brain metastases is paramount, as they are considered incurable and their  
60 incidence is on the rise due to prolonged survival of cancer patients. Here, we demonstrate  
61 that systemic prophylactic treatment with CpG-C reduces peripheral and brain metastasis of  
62 mouse and human lung cancers. While traditional therapies are halted during the  
63 perioperative period, we found systemic CpG-C treatment during this time frame beneficial in  
64 a model of spontaneous brain metastases following excision of a primary melanoma tumor,  
65 comprehensively mimicking the clinical setting. Mechanistically, we show microglia activation  
66 with CpG-C results in tumor cell eradication, pointing to microglia as potential therapeutic  
67 targets. Importantly, CpG-ODNs have negligible toxicity in humans. Therefore, CpG-C may  
68 be used prophylactically and during the perioperative period in high-risk cancers.

69

70

71

72

73 **Introduction**

74 Ten to twenty percent of cancer patients develop brain metastases, commonly as the final  
75 stage of cancer progression, with lung and melanoma cancers having the highest incidence  
76 (40-50% and 30-50%, respectively) (1). Therapies include surgery and radiation, however  
77 both treatments result in only a modest survival advantage and are associated with cognitive  
78 impairments (2). Chemotherapy is often inefficient due to impermeability of the blood-brain  
79 barrier (BBB) (1), and as it often induces astrocyte-derived tumor-protecting responses (3).  
80 Overall, the efficacy of currently available treatments for brain metastasis is extremely  
81 limited, making it a deadly disease with a short survival period (2). Thus, prophylactic  
82 approaches against the establishment of brain metastasis, or early elimination of brain  
83 micrometastases, could prove key in treating cancer (2,4,5), even more so given ongoing  
84 progression in early cancer detection and prevention of peripheral metastases.

85

86 In recent years, immune-modulation using toll-like receptors (TLRs) agonists has been given  
87 much attention as a therapeutic approach against primary tumors and metastasis (6).  
88 Specifically, the TLR9 agonists CpG-oligodeoxynucleotides (ODNs) are being explored in a  
89 wide range of tumor types, both as single agents and as adjuvants (7,8), and are being  
90 tested in several clinical trials (9). In various animal models, CpG-ODN treatment was shown  
91 to reduce mammary lung metastases by eliciting anti-tumor NK activity (9), and even result  
92 in rapid debulking of large tumors by macrophage stimulation (10). Employed  
93 prophylactically, CpG-ODNs were shown to markedly improve resistance to experimental  
94 and spontaneous peripheral metastasis of mammary (11), colon (12), and melanoma (13)  
95 tumors.

96

97 Given the low success rate of treatments against established brain metastases (1),  
98 prophylactic treatment against metastatic brain disease may be key to improve survival rates  
99 (4). Such treatment should be given chronically between primary tumor diagnosis and until  
100 several days/weeks following tumor removal. This time frame includes the short  
101 perioperative period, which was shown to constitute a high-risk period for initiation or  
102 accelerated progression of metastasis (14). Prophylactic treatment should be especially  
103 advantageous in patients with primary tumors that have high potential of developing brain  
104 metastases, such as lung, melanoma and breast cancers (15). In fact, the concept of  
105 prophylactic treatment against brain metastasis is not unprecedented and is routinely  
106 practiced in the clinic. Small-cell lung cancer (SCLC) patients without detectable brain  
107 metastases often undergo prophylactic whole brain radiation therapy, thereby reducing  
108 occurrence of brain metastases and improving survival (16,17). However, to implement a  
109 prophylactic approach against brain metastases in a wider range of patients, a less toxic

110 (18) treatment is required. TLR9 stimulation using CpG-ODNs is particularly well suited to  
111 meet this need as, it has negligible toxicity in humans (19–21), and has already promising  
112 preclinical outcomes in other organs (10–13); therefore, it should also be considered a  
113 potential prophylactic approach against the establishment of brain metastases.

114

115 In the brain, TLR9 is expressed on neurons, astrocytes, microglia, and endothelial cells  
116 (22,23). Recent studies suggest that TLR9 signaling plays a key role in cerebral ischemia  
117 (24), cerebral malaria (25), Alzheimer's (26,27), and seizures (28), pointing to its key role in  
118 healthy brain function and neuro-immune modulation. Notably, intracerebral (29,30) and  
119 retro-orbital (31) administration of CpG-ODNs were shown to hinder growth of glioma (31)  
120 and intracranially-injected melanoma cells (29,30). Importantly, CpG-ODN yielded promising  
121 initial outcomes with minimal toxicity in a few phase I/II clinical trials of recurrent (20,21) and  
122 de novo (19) glioblastoma, when injected into tumor-excised lesions. However, as a  
123 prophylactic measure against potential brain metastasis, CpG-ODNs would need to be  
124 administered systemically, provided they can cross the BBB.

125

126 Here, we assessed the efficacy of a systemic administration of CpG-C as a prophylactic  
127 treatment for brain metastasis using three pre-clinical mouse models, including experimental  
128 metastasis of syngeneic and of human lung carcinoma, and spontaneous metastasis of  
129 syngeneic melanoma. Importantly, the inoculation methodologies and imaging approaches  
130 implemented here preserve intact both the neuro-immune niche and brain hemodynamics  
131 intact; crucial factors affecting metastatic early stages (32). We demonstrate that acute and  
132 chronic prophylactic treatments result in reduced brain metastasis in both sexes and across  
133 ages. Notably, we found that NK cells and monocytes/macrophages do not take part in the  
134 initial steps of the metastatic process in the brain, nor do they mediate the effects of CpG-C,  
135 as opposed to their role in peripheral organs. We establish that peripherally administered  
136 CpG-C crosses into the brain parenchyma without affecting BBB permeability, and that  
137 cerebral endothelial cells, astrocytes, and microglia uptake it. We found that CpG-C-  
138 activated primary microglial cells and the N9 microglial cell line (but not primary astrocytes)  
139 eradicate tumor cells *in vitro*, through direct contact, by increasing microglia cytotoxicity and  
140 phagocytic potential. Importantly, we demonstrate *in vivo* that following systemic CpG-C  
141 treatment microglia cells contact, kill, and phagocytize tumor cells during the early stages of  
142 invasion into the brain. Blocking microglia activation or depleting them abolished the  
143 beneficial effects of CpG-C. Taken together, our results point to CpG-C as an important  
144 potential prophylactic treatment against brain metastasis through direct activation of  
145 microglia.

146

147 **Methods**

148 **Cell preparation and *in vitro* experiments**

149 Tumor cells – Mouse D122 Lewis lung carcinoma (LLC) and mouse Ret melanoma cells(33)  
150 (both syngeneic to C57BL/6J mice), and human PC14-PE6 adenocarcinoma cells were  
151 cultured in complete media (RPMI1640 supplemented with 10% fetal bovine serum and 1%  
152 penicillin/streptomycin; Biological Industries). D122-LLC and PC14-PE6 cells (kindly  
153 provided by Prof. Isaiah Fidler) were double labeled with mCherry and Luc2 (pLNT/Sffv-  
154 MCS/ccdB plasmid was kindly provided by Prof. Vaskar Saha), and Ret melanoma cells  
155 were labeled with mCherry. For two-photon experiments, D122 cells were infected with  
156 pLVX-tdTomato-N1 (Clontech). For experiments assessing cancer cell retention, cultured  
157 tumor cells were incubated with <sup>125</sup>IUDR during the last 24 hours of proliferation. Before  
158 injection, cells were washed and harvested (0.25% trypsin-EDTA; Invitrogen) at ~90%  
159 confluence, re-suspended in PBS supplemented with 0.1% BSA (Biological Industries), and  
160 kept on ice throughout the injection procedures, completed within 3 hours of cell harvesting.  
161 More than 95% of cells were vital throughout the injection period.

162 Primary cultures (Fig. 5a-d) – We followed the mild trypsinization procedure (34). Briefly,  
163 cortices of 1-3 days old C57BL/6J pups were cultured in 12-well plates at a concentration of  
164  $4 \times 10^5$  cells/well. After 18-25 days, astrocytes were removed with trypsin and cultured on  
165 separate plates. Cultures were used within 4 days from trypsinization.

166 Microglial N9 cell line (35) (Fig. 5e-i) – cells were cultured in complete media (see above) at  
167 a concentration of  $4 \times 10^4$  cells/well.

168 **Experimental procedures:**

169 Cultures were subjected to 100nM/L of CpG-C or non-CpG ODN (control) for 24 hours and  
170 media was harvested for conditioned-media experiments (Fig. 5b,d,g). Cultures were  
171 washed twice and supplied with fresh media. For contact co-cultures experiments (Fig.  
172 5a,c,e,h), D122 cells were plated on top of the microglia cultures for six hours, following  
173 which cell-lysis (primary cultures; Fig. 5a,c), bioluminescence imaging (N9 cultures; Fig. 5e),  
174 or FACS analysis (Fig. 5h) assays were conducted. For no-contact co-cultures (Fig. 5i),  
175 D122 cells were plated on 13mm cover slips, and placed on top of 2mm thick costume made  
176 polydimethylsiloxane 11mm rings over the microglial cultures (sharing the same media for  
177 six hours). For conditioned-media experiments (Fig. 5f), D122 cultures were washed and  
178 supplied with fresh or conditioned-media harvested from microglia or astrocyte cultures, for  
179 six hours.

180 **Cell-lysis assay** (Fig. 5a-d) – Standard cytotoxicity assay was conducted as previously  
181 described (36). Briefly, we used two concentrations of <sup>125</sup>IUDR-labeled D122 cells in 12-well

182 plates ( $1 \times 10^4$  and  $2 \times 10^4$  cells/well). Radioactive signal from the media was measured using  
183 a gamma counter (2470, PearkinElmer). Specific killing was calculated as:

$$\left[ \frac{\text{sample release} - \text{spontaneous release}}{\text{maximal release} - \text{spontaneous release}} \right] \times 100$$

184 ***In vitro* bioluminescence viability assay** (Fig. 5e-g) – N9 cells were plated in 24-well  
185 plates ( $40 \times 10^3$  cells/well) and treated with CpG-C or non-CpG ODN for 24 hours. We used  
186 two concentrations of Luc2-labeled D122 cells in 24-well plates ( $1.6 \times 10^4$  and  $3.2 \times 10^4$   
187 cells/well). D-luciferin (30mg/ml, 10 $\mu$ l) were mixed in each well and bioluminescence signal  
188 was immediately measured for two minutes using Photon Imager and analyzed with M3  
189 Vision (Biospace Lab).

190 Lysis and bioluminescence assessments were repeated in at least three separate  
191 experiments, each one conducted in quadruplicates or more.

192 **Apoptosis quantification** (Fig. 5h and Supplementary Fig. 8) – co-cultures of N9 and D122  
193 cells were stained for annexin V (88-8005-72, eBioscience), as per manufacturer's  
194 instructions. We quantified the percent of annexin V positive (apoptotic) cells from all  
195 mCherry positive (D122) cells using FACScan (Becton Dickinson).

196 **Phagocytosis assay** (Fig. 5i) – N9 cells were plated in 96-well plates ( $30 \times 10^3$  cells/well) and  
197 treated with CpG-C or non-CpG ODN for 24 hours. Cultures were washed twice and plated  
198 with pHrodo™ Red Zymosan Bioparticles™ (ThermoFisher Scientific) conjugate for  
199 phagocytosis, according to the manufacturer's instructions. These particles become  
200 fluorescent only after phagocytized into the lysosomes. Fluorescence was measured with  
201 Synergy HT (BioTek) microplate reader at 545/585 (Ex/Em) every 30-60 minutes thereafter  
202 (up to 6 hours). The maximum difference between experimental groups was used for  
203 statistical analysis.

204

205 **Scratch assay** (Supplementary Fig. 7a) - N9 cells were plated in 96-well plates ( $30 \times 10^3$   
206 cells/well) and treated with CpG-C or non-CpG ODN as above. Plates were washed and  
207 fresh media was added. Confluent cultures were scratched (700 $\mu$ m) using the IncuCyte  
208 Zoom system (Essen BioScience), washed, and imaged once every two hours for 28 hours.

209

## 210 **Animals and Anesthesia**

211 All studies were approved by the Tel Aviv University and Columbia University corresponding  
212 ethics committees for animal use and welfare and in full compliance with IACUC guidelines.

213 C57BL/6J, athymic nude mice (Hsd:Athymic Nude-Foxn1nu), CX3CR1<sup>GFP/+</sup> knock-in  
214 (B6.129P-Cx3cr1tm1Litt/J), and Tg eGFP-Claudin5 (37) male and female mice were used  
215 (8-52 weeks old; age matched within experiment). Animals were housed under standard  
216 vivarium conditions (22±1 °C, 12h light/dark cycle, with ad libitum food and water).  
217 Anesthesia was first induced by 5% Isoflurane, and then maintained on 1.5-2% throughout  
218 the procedures. When anesthetized, core body temperature of animals was maintained at  
219 37°C.

220

### 221 **Internal carotid artery inoculation of tumor cells**

222 Tumor cells were injected using the assisted external carotid artery inoculation (aECAi; Fig.  
223 1a), as previously described (32). Briefly, mice were anesthetized and the external carotid  
224 artery (ECA) uncovered. A 6-0 silk-suture ligature was loosely placed around the ECA  
225 proximal to the bifurcation from the common carotid artery (between the superior thyroid  
226 artery and the bifurcation). A second ligature was tied on the ECA distal to the bifurcation. A  
227 NANOFIL-100 (WPI) syringe with a 34G beveled needle was mounted to a micromanipulator  
228 (M33, Sutter Inc). The needle was inserted slowly into the lumen of the ECA and advanced  
229 to the point of bifurcation. The first ligature was tied around the needle, and 1×10<sup>5</sup> cells in  
230 PBS (100µl) were slowly infused into the internal carotid artery. The needle was then  
231 removed, the ligature quickly tied, and the skin sutured. Total time for the complete  
232 procedure is ten minutes.

233

### 234 **Spontaneous melanoma brain metastasis**

235 For a spontaneous brain metastasis model (Fig. 1g) we used the Ret-melanoma model, we  
236 have recently established and validated (33). Briefly, mice were anesthetized by isoflurane,  
237 and a total of 5×10<sup>5</sup> (50µl) Ret-mCherry sorted (RMS) cells in a 1:1 suspension of PBS with  
238 growth factor–reduced Matrigel (356231, BD Biosciences) were injected subdermally to the  
239 right dorsal side, rostral to the flank, with a 29G insulin syringe (BD Biosciences). Tumors  
240 were measured four times weekly by calipers. Tumor volumes were calculated using the  
241 formula  $X^2 \times Y \times 0.5$  (X-smaller diameter, Y-larger diameter). We aimed to remove the tumor at  
242 a size of ~500 mm<sup>3</sup>. Therefore, and based on our experience, once tumors reached a size of  
243 ~125mm<sup>3</sup>, mice were given two injections of CpG-C or PBS (control group) every other day.  
244 One day later (i.e. three days following the first CpG-C treatment and one day following the  
245 second CpG-C treatment), tumor sizes were verified (meeting our expectations, with no  
246 differences between treatment groups), and immediately removed. The last tumor removal  
247 was carried out six days after the first removal. For tumor excision, mice were anesthetized  
248 with isoflurane, and an incision, medial to the tumor, was made in the skin. Tumors were



249 detached from inner skin with clean margins to prevent recurrence. Tumor-associated  
250 connective tissue and blood vessels were detached, and the incision was sutured. Primary  
251 tumors were sectioned and measured with no difference identified at excision time  
252 (Supplementary Fig. 1a). Mice were weighed weekly and monitored for relapse. Nine weeks  
253 of last tumor excision, mice were deeply anesthetized with isoflurane and transcardially  
254 perfused with cold PBS. Brains and lungs were harvested, macroscopically examined for  
255 abnormal lesions and flash-frozen in liquid nitrogen. RNA was isolated using EZ-RNA II kit  
256 (20-410- 100, BI) according to the manufacturer's instructions. Whole organs were  
257 homogenized in denaturation solution A in M tubes (130-096- 335, Milteny Biotec) by  
258 gentleMACS dissociator (Milteny Biotec). Reverse transcription was performed with qScript  
259 (95047-100, Quanta Biosciences). qRT-PCR analyses were conducted using PerfeCTa  
260 SYBR Green FastMix, ROX (95073-012- 4, Quanta Biosciences) with primers for *Hprt* (F  
261 sequence – GCGATGATGAACCAGGTTATGA; R sequence –  
262 ATCTCGAGCAAGTCTTTCAGTCCT) and *mCherry* (F sequence –  
263 GAACGGCCACGAGTTCGAGA; R sequence – CTTGGAGCCGTACATGAACTGAGG).  
264 In all analyses expression results were normalized to *Hprt*. RQ ( $2^{-\Delta\Delta Ct}$ ) was calculated.  
265 Of the 50 animals initially injected with tumor cells, two animals did not develop primary  
266 tumors and were withdrawn from the experiment; of the remaining 48 animals, 28 animals  
267 were treated with CpG-C and 20 with PBS (control). Twenty-two animals (45% of control and  
268 46% CpG-C treated) died during the period between tumor excision and the day of sacrifice,  
269 leaving 15 CpG-C treated animals and 11 control animals. In three CpG-C animals and two  
270 control animals we did not detect *mCherry* RNA in the brains. The herein development of  
271 primary tumor and metastases is expected based on our previous studies in this tumor  
272 model (33). Tumor burden was compared in animals bearing brain micrometastasis.

273

274 **Oligodeoxynucleotides (ODN) treatment** - CpG-C, CpG-C-FITC, and CpG-C-TAMRA  
275 (ODN 2395: 5'-TCGTCGTTTTCGGCGCGCGCCG-3') with a phosphorothioate backbone  
276 and non-CpG ODN (ODN 2137: 5'-TGCTGCTTTTGTGCTTTTGTGCTT -3'), endotoxin free,  
277 were purchased from Sigma-Aldrich. Two different controls were used: Phosphate buffered  
278 saline (PBS), and non-CpG ODN, which lacks C-G motifs (counterbalanced within  
279 experiments with no differences in results). Both CpG-C variants and non-CpG ODN were  
280 diluted in PBS, and administered intraperitoneally (100 $\mu$ l) at a dose of 0.4 or 1.2mg/kg  
281 (Supplementary Fig. 2c), or 4mg/kg (all *in vivo* experiments). No differences were found  
282 between PBS and non-CpG ODN treated animals and therefor combined in the statistical  
283 analyses (Supplementary Fig. 6a).

284

285 **Depletion of NK cells and monocytes/macrophages** - For depletion of NK cells (Fig.  
286 2a,b), anti-NK1.1 monoclonal antibodies (mAbs) were intraperitoneally administered  
287 (4mg/kg) twenty-four hours before tumor cell injection. 12E7 mAb against human CD99  
288 served as control. Antibodies (38) were kindly provided by Prof. Ofer Mandelboim (The  
289 Hebrew University of Jerusalem, Israel). To verify depletion of NK cells, blood was collected  
290 from animals when sacrificed, and prepared for staining with NK1.1 FITC (eBioscience) and  
291 NKp46 PE (BioGems) (39). FACS analysis indicated >90% depletion (Supplementary Fig.  
292 3a).

293 For monocytes/macrophages depletion (Fig. 2c,d), we administered clodronate liposomes  
294 (ClodronateLiposomes.org) intravenously (200µl) twenty-four hours before tumor cell  
295 injection. PBS liposomes served as controls. To verify depletion of monocytes, but not  
296 microglia, blood and brains were collected from animals when sacrificed, and prepared for  
297 staining with F4/80 FITC and CD11b APC (BioGems). FACS analysis indicated >85%  
298 depletion of monocytes/macrophages, without affecting microglia viability (Supplementary  
299 Fig. 3b).

300

301 **Microglia inactivation** (Fig. 7a,b) – To block microglia activation and transition into an  
302 inflammatory state (40), minocycline hydrochloride (Sigma-Aldrich) was administered  
303 intraperitoneally at a dose of 40mg/kg (200µl) at 48, 32, and 24 hours before tumor cell  
304 injection.

305

306 **Depletion of microglia cells** (Fig. 7c) – For depletion of microglia cells mice were  
307 administered the dietary inhibitor of colony stimulating factor-1 receptor (CSF1R), PLX5622  
308 (1200mg/kg chow; provided by Plexxikon Inc. and formulated in AIN-76A standard chow by  
309 Research Diets Inc.), for 18 days; resulting in near complete elimination of microglia cells  
310 (41). AIN-76A standard chow served as control (Research Diets Inc.).

311

## 312 **Histology**

313 C57BL/6J and athymic nude mice from the bioluminescence experiments were perfused  
314 with PBS supplemented with 30U heparin (Sigma) and 4% PFA (EMS). Brains were  
315 harvested, fixed overnight in 4% PFA, and placed in 30% sucrose overnight. Thirty-micron  
316 sections (Leica SM 2000 microtome) were counterstained with DAPI (MP Biomedicals).  
317 Images of the sections were obtained using a fluorescent microscope (Olympus ix81;  
318 Fig.1b).

319 To visualize CpG-C uptake in the parenchyma, TAMRA-labeled CpG-C was injected to  
320 CX3CR1<sup>GFP/+</sup> mice. Twenty-four hours later animals were perfused, and brains fixed and  
321 sectioned. Astrocytes were stained using a primary anti-GFAP antibody (1:800; Invitrogen),



322 and endothelial cells with anti-CD31 (PCAM-1) antibody (1:500; Santa Cruz). A secondary  
323 Alexa 647 antibody (1:600; Invitrogen) was used, coupled with DAPI (1:1000; ENCO)  
324 staining. Images of the sections were obtained using a Leica SP8 confocal microscope at  
325 0.5 $\mu$ m intervals using a  $\times$ 63 (NA – 1.4) oil immersion objective.

326

### 327 **Lysotracker staining**

328 Cultures of N9 cells grown on cover slips were treated with CpG-C-TAMRA for 24 hours and  
329 washed three times. LysoTracker™ Blue DND-22 (50nM, ThermoFisher Scientific) was  
330 applied for 30 minutes at 37°C, and cover slips were washed and mounted on slides. For  
331 staining of CpG-C uptake *in vivo* a single cell suspension was prepared from CX3CR1<sup>GFP/+</sup>  
332 mice treated with CpG-C-TAMRA as described in the ImageStream FACS analysis protocol  
333 herein. LysoTracker™ Blue DND-22 (50nM, ThermoFisher Scientific) was then mixed into  
334 the cell suspension for 30 minutes at 37°C and cells were mounted on a cover glass and  
335 imaged with a Leica SP8 confocal microscope using a  $\times$ 63 (NA – 1.4) oil immersion  
336 objective (Fig. 5b). Similarly, for the cells extracted from the brains of animals, we imaged  
337 only GFP positive cells (i.e. microglia).

338

339

### 340 **Claudin5 continuity and IgG and biocytin-TMR leakage quantification**

341 Tg eGFP-Claudin5 (37) mice were treated with CpG-C or PBS, and 23h later were injected  
342 with 1% biocytin-TMR (i.v., Life Technologies). One hour later animals were sacrificed and  
343 perfused with PBS and 4% paraformaldehyde (PFA). Brains and livers were harvested, fixed  
344 for six hours in 4% PFA at 4°C, and placed in 30% sucrose overnight at 4°C. Tissues were  
345 embedded in O.C.T (Sakura), sectioned (12 $\mu$ m) using a Leica cryostat, and stained for  
346 eGFP (1:1000; Life Technologies) and IgG (1:1000; Invitrogen). Z-stacks of the sections  
347 were obtained with a Zeiss LSM700 confocal microscope using a water immersion  $\times$ 40  
348 objective (NA – 1.2) and maximum projections were created using Fiji (version 1.0). At least  
349 5 images were used for quantification for each anatomical region. Biocytin-TMR and IgG  
350 intensity was quantified using Fiji software and normalized on fluorescence intensity in the  
351 liver (Fig. 4a,b and Supplementary Fig. 4a-c). For quantification of gaps in tight junctions  
352 (Fig. 4c and Supplementary Fig. 4d), we quantified the percentage of junctional strands  
353 showing at least one gap (defined as a discontinuity in eGFP-Claudin5 signal  $>0.4\mu$ m) over  
354 the total number of junctional strands (37).

355

### 356 **Immune infiltration analysis**

357 To test whether CpG-C affects immune cell infiltration into the brain, sections of PBS and  
358 CpG-C treated mice were stained for CD68 (1:1,000; Abcam) and CD4 (1:200; Abcam). To

359 assure we do not analyze immune cells arrested in the vessels, we co-stained slices with  
360 laminin (1:1,000; Sigma) to detect vessel walls. As a positive control we used spinal cord  
361 sections of experimental autoimmune encephalomyelitis (EAE) mice (refer to (42) for  
362 experimental procedure; Fig. 4d).

363

364 ***In vivo* and *ex-vivo* bioluminescent imaging** (Fig. 1c-e) – To follow progression of tumor  
365 growth *in vivo*, we used an IVIS SpectrumCT (PerkinElmer) for the syngeneic model and  
366 Photon Imager (Biospace Lab) for the xenograft model. Briefly, mice were anesthetized and  
367 injected with D122-mCherry-Luc2 (C57BL/6J) or PC14-PE6-mCherry-Luc2 (athymic nude)  
368 cells. Imaging sessions were conducted on days 1, 4, 7, 14 and 21 following tumor cell  
369 administration (in the xenograft model, also on day 25). After the last *in vivo* imaging session  
370 in the syngeneic model, mice were sacrificed, and brain and extra-cranial head tissue were  
371 rapidly imaged separately. Notably, tissue from one control animal was lost in the final  
372 process. Each imaging session was preformed between 10-20 minutes following D-Luciferin  
373 sodium salt injection (30mg/ml, 100 $\mu$ l, i.p; Regis Technologies), as this time frame exhibited  
374 maximal and steady intensity. Analysis was done using Living Image software (version  
375 4.3.1) for the IVIS images data, and M3 vision for the Photon Imager data.

376

377 ***Ex-vivo* fluorescence imaging** (Fig. 1f) – To quantify fluorescence in brains of athymic nude  
378 mice injected with PC14-PE6-mCherry-Luc2, animals were decapitated and brains were  
379 extracted immediately following the last imaging session. We used a Maestro spectral  
380 fluorescence imaging system (Cambridge Research & Instrumentation) and quantified  
381 fluorescent signal using Maestro version 2.2 software. Regions of interest (ROIs) were  
382 drawn on each fluorescent signal to quantify the area of fluorescent signal.

383

#### 384 **Assessment of brain and peripheral organ retention of cancer cells**

385 Mice were injected with  $1 \times 10^5$   $^{125}$ IUDR labeled D122-LLC cells using the aECAi approach  
386 (32), and euthanized 24 hours later. Animals were transcidentally perfused with 20ml PBS  
387 supplemented with 30U heparin (Sigma-Aldrich). Brain and lungs were collected, and  
388 radioactivity was measured using a gamma counter (2470, PearkinElmer; Figs. 1f-h, 2,  
389 7a,c).

390

#### 391 **Two-photon laser scanning microscopy**

392 For two-photon microscopy measurements, CX3CR1<sup>GFP/+</sup> and WT mice were implanted with  
393 a polished and reinforced thin-skull (PoRTS) window, as previously described (43).  
394 Importantly, this craniotomy does not elicit an inflammatory response (43). Mice were then  
395 habituated to the imaging apparatus for 7 days to reduce procedural stress. CX3CR1<sup>GFP/+</sup>

396 animals were injected with  $1 \times 10^5$  tdTomato-labeled D122 cells. Before imaging, mice were  
397 injected with Alexa Fluor 633 hydrazide (2.5% w/v, i.v.; Invitrogen) for visualization of  
398 arteries (40). Imaging sessions were initiated 2-4 hours after tumor cell inoculation, and at  
399 days 1, 2, 4 and 7, returning to the exact same location each session. Imaging was  
400 conducted at depths of 50-200 $\mu$ m with a custom-modified two-photon laser-scanning  
401 microscope based on a Sutter MOM (Sutter Inc) controlled through the ScanImage software  
402 (Vidrio Technologies). A Chameleon Ultra II (Coherent Inc) provided the 80MHz, 140fs  
403 pulsed light used for imaging and laser photodamage.

404 For quantification of microglia-tumor cells interaction, 150 $\mu$ m stacks were obtained and max  
405 projected every 10 $\mu$ m. The number of contacts and internalization events in each stack were  
406 manually quantified blindly at 4 hours following tumor cell injection, and at days 1, 4 and 7  
407 (Fig. 6d,e). For imaging CpG-C uptake by microglia *in vivo* (Supplementary Fig. 5a),  
408 baseline imaging of cortices of CX3CR1<sup>GFP/+</sup> mice was performed at 890nm, CpG-C-TAMRA  
409 was injected (4mg/kg; 100 $\mu$ l; i.p), and 24h later mice were imaged again at the exact same  
410 locations (Supplementary Fig. 5a).

411

412 For longitudinal BBB assessment (Fig. 4e,f), WT mice implanted with a PoRTS window were  
413 treated with four PBS or CpG-C injections every other day (similarly to the spontaneous  
414 melanoma brain metastasis experiment). BBB leakage dynamics of a low molecular weight  
415 dye (sodium fluorescein; NaF; 376Da; Sigma-Aldrich) and of a higher molecular weight dye  
416 (Texas Red; 70kDa; Invitrogen) was imaged simultaneously at 940nm. Imaging session took  
417 place at baseline (before treatment), one day following the first CpG-C/control treatment,  
418 and one day following the last treatment. To this end, ten minutes following dye injection,  
419 100 $\mu$ m stacks were taken every ten minutes for a total of ninety minutes. For quantification  
420 of dye leakage max-projections of each session were aligned using Fiji software (2.0) plugin  
421 *linear stack alignment with SIFT*. Eight vessels (four capillaries 5 $\mu$ m and smaller, and four  
422 vessels 20-50 $\mu$ m in diameter) were blindly selected manually and average intensity was  
423 measured inside the vessel and adjacent to it (in the parenchyma). The ratio over time  
424 between the amount of dye inside and outside the vessels was computed (Fig. 4f). For  
425 display purposes only, image contrast was automatically adjusted using the Fiji *autoadjust*  
426 display function while measurements were taken directly from pixel values.

427

## 428 **Two-photon laser photodamage**

429 In order to assess microglia reactivity, focal laser-induced thermal damage insults were  
430 performed as previously described (44) (Supplementary Fig. 7b). Briefly, CX3CR1<sup>GFP/+</sup> mice  
431 underwent craniotomy and three weeks later microglia were imaged at 890nm. A baseline  
432 stack (0-30 $\mu$ m depth) was imaged and a small (~15-20 $\mu$ m) localized injury was achieved by

433 focusing a two-photon laser beam (780 nm; 150mW at the sample; ~1 $\mu$ m size) at 15 $\mu$ m  
434 depth for 2s. Stacks were imaged every two minutes for 40min. Using Fiji software (1.0),  
435 maximum z-projections were turned into binary images. A 60 $\mu$ m circle was drawn around the  
436 ablation area, and, for each time point, number of white pixels were counted inside the small  
437 circle ( $x(t)$ ). For the baseline image, another 120 $\mu$ m circle was drawn, and the number of  
438 white pixels in the ring between the two circles were counted ( $y(0)$ ). Response was  
439 calculated as:  $x(t) - x(0)/y(0)$ .

440

#### 441 **ImageStream**

442 Preparation of tissue for ImageStream (MK II; Amnis) FACS analysis – mice were perfused  
443 with PBS supplemented with 30U heparin (Sigma-Aldrich), and brains removed. Brains were  
444 mechanically minced, suspended in a solution containing collagenase (0.1%w/v;  
445 Worthington) and dispase (0.2%w/v; Roche) for 20 minutes and then in DNase (Sigma-  
446 Aldrich) for 20 minutes, and suspensions were passed through a 70 $\mu$ m filter. Fatty tissue  
447 was removed using Percoll (Sigma-Aldrich), and cells were re-suspended in PBS  
448 supplemented with 1% EDTA (Sigma-Aldrich), 0.01% NaN<sub>3</sub> (Sigma-Aldrich), and 1% FBS  
449 (Biological Industries). In each experiment  $1 \times 10^4$  events were collected and analyzed using  
450 Amnis IDEAS software (Version 6.2). Analysis gates were manually corrected based on  
451 images of the events. Internalization was quantified automatically using the software's  
452 internalization wizard (Fig. 6f-h, 7b; Supplementary Fig. 8).

453 For quantification of CpG-C infiltration into the brain and its internalization by endothelial  
454 cells, astrocytes, and microglia (Fig. 3), mice were injected with FITC-labeled CpG-C 24  
455 hours before sacrifice, and single cells suspensions were stained using anti-CD31 (PCAM-1)  
456 PE-Cy7 (eBioscience), Anti-GLAST (ACSA-1)-PE (MACS), and anti-CD11b APC (BioGems).  
457 To avoid GLAST staining of Bergmann glia, cerebellums were removed before preparation of  
458 the samples in this experiment. In each population, we quantified the percent of cells with  
459 internalized FITC.

460

#### 461 **Quantitative polymerase chain reaction**

462 In two independent experiments (Fig. 8), male and female mature (4-6 months) CX3CR1<sup>GFP/+</sup>  
463 mice were treated with CpG-C or non-CpG ODN/PBS. Twenty-four hours later mice were  
464 perfused, brains were harvested and processed into a single-cell suspension as described  
465 above. GFP-positive cells (microglia) were sorted (FACS Aria IIU, BD Biosciences), and RNA  
466 was extracted with TRIzol® (Invitrogen). cDNA was prepared and used for quantitative PCR  
467 and the results were normalized to *Gapdh*. All primers and probes were purchased from  
468 Applied Biosystems, *Cd36* (Mm00432403\_m1), *Cd47* (Mm00495006\_m1), *Cd68*  
469 (Mm03047343\_m1), *Fasl* (Mm00438864\_m1), *Gapdh* (Mm99999915\_g1), *Inf- $\gamma$*

470 (Mm01168134\_m1), *I11-β* (Mm00434228\_m1), *Il-6* (Mm00446190\_m1), *Marco*  
471 (Mm00440250\_m1), *Nos2* (Mm00440502\_m1), *Tmem119* (Mm00525305\_m1), *Tnf*  
472 (Mm00443258\_m1), *Tnfsf10* (Mm01283606\_m1), *Trem2* (Mm04209424\_g1). One control  
473 sample was removed as an outlier from statistical analysis of *Tnf* and *Inf-γ* (25 SEMs and 50  
474 SEMs, respectively).

475

#### 476 **Volumetric image display**

477 Three-dimensional volumetric reconstruction of single cells (Fig. 3a, Supplementary Fig. 5a)  
478 or fields of view (Fig. 6c) were performed in a semi-automatic way using Amira software  
479 (ThermoFisher Scientific). Auto-thresholding mode was initially used to detect the brightest  
480 object, which depending on the experiment and the spectral channel under analysis,  
481 represented either cell soma or aggregates of labeled CpG-C. Cell morphology was partially  
482 reconstructed by manual labeling after thresholding.

483

#### 484 **Statistical analysis**

485 Prism (version 7.0c) and Python (version 3.6.3) were used for statistical analysis. Where  
486 appropriate, the Kolmogorov–Smirnov normality test was used to determine normal  
487 distribution of the data, and the F-test or Brown-Forsythe tests for determining homogeneity  
488 of variance. For normally distributed data with equal variance, we used one-way ANOVA  
489 (Figs. 5a-g, 7b, Supplementary Figs. 6a,b), two-way ANOVA (Figs. 1c.i,e,i, 3b, 6e,  
490 Supplementary Figs. 2e, 4, 7), two-tailed unpaired Student's t-test (Figs. 1d,e.ii,g, 4a-c, 5h,i,  
491 6h, Supplementary Fig. 1d), or one-tailed unpaired Student's t-test (Fig. 8) to compare  
492 experimental groups. For normally distributed data with unequal variance we used Mann–  
493 Whitney U-test (Figs. 1c.ii,f, 6f,g Supplementary Fig. 1c, 2a,b) or Kruskal-Wallis  
494 (Supplementary Fig. 2c,d) to compare experimental groups. For non-normally distributed  
495 data we used two-way permutations (Figs. 2, 7a,c) to compare experimental groups. For  
496 post-hoc analysis, multiple comparisons were corrected using Dunn's test, Tukey's, or  
497 Bonferroni's, according to the primary analysis and the software's recommendation. For  
498 quantification of primary tumor growth dynamics (Supplementary Fig. 1b) and for longitudinal  
499 BBB leakage (Fig. 4e,f), we applied a least squares fit model of an exponential growth curve  
500 or one-phase exponential decay curve, respectively, and compared fits of the treated and  
501 control groups. p-values smaller than 5% were considered significant. In all experiments,  
502 measurements were taken from distinct samples (different animals for *in vivo* experiments  
503 and different wells for *in vitro* experiments).

504

505 **RESULTS**

506 **Prophylactic CpG-C treatment reduces brain metastases in experimental and**  
507 **spontaneous metastases models**

508 To study the prophylactic efficacy of the TLR9 agonist CpG-C in reducing brain metastasis,  
509 we first employed two models of non-small-cell lung carcinoma, given the clinical prevalence  
510 of brain metastases in this type of cancer (15,45). To this end, we used the highly metastatic  
511 D122 variant of the syngeneic Lewis lung carcinoma (LLC) in C57BL/6 mice (32), and the  
512 human xenograft PC14-PE6 cells in athymic nude mice (46). For exclusive injection of tumor  
513 cells to the cerebral circulation, we used a novel approach that we have recently developed  
514 and validated – the assisted external carotid artery inoculation (aECAi; Fig. 1a,b) (32) –  
515 which results in improved targeting of tumor cells to the brain, and avoids cerebral blood flow  
516 perturbations. A single prophylactic systemic injection of CpG-C was given 24 hours before  
517 tumor cell injection. Brain tumor growth was monitored thereafter using *in vivo*  
518 bioluminescence imaging. Animals pretreated with CpG-C displayed reduced cerebral tumor  
519 growth in both the syngeneic ( $p=0.0011$ ; Fig. 1c) and the xenograft ( $p<0.0001$ ; Fig. 1e)  
520 models, exhibiting a statistically significant difference starting on days 14 and 4, respectively.  
521 At end point, signal intensity, which is indicative to the tumor burden, was 77-fold lower in  
522 the CpG-C treated mice in the syngeneic D122 model ( $n=6$ ;  $p<0.0001$ ), and 82-fold lower in  
523 the xenograft model ( $n=7$ ;  $p<0.0001$ ), compared to their matching control groups ( $n=7$  in  
524 both models). To assure that the differences between groups originated from tumor growth  
525 within the brains, rather than from extra-cranial growth (32), we harvested the brains and  
526 measured the tumor signal in both models. In the syngeneic model, brains from CpG-C  
527 treated animals had 48-fold lower bioluminescent signal compared to control animals  
528 ( $p=0.0040$ ; Fig. 1d). Similarly, in the xenograft model the mean area of fluorescence signal,  
529 indicative of brain tumor burden, was significantly smaller in CpG-C treated animals  
530 ( $p=0.0373$ ; Fig. 1f).

531 To test the efficacy of CpG-C treatment in a context that better resembles the clinical setting,  
532 we used a murine model of spontaneous brain metastasis that we have recently established  
533 (33). In this model, mCherry-expressing Ret melanoma cells are injected orthotopically,  
534 resulting in growth of a primary tumor in the flank. During the perioperative period – three  
535 days before and after primary tumor excision – animals were treated with CpG-C ( $n=15$ ) or  
536 vehicle ( $n=11$ ), with no measurable impact on primary tumor growth ( $p=0.6066$  for tumor  
537 growth dynamics and  $p=0.9260$  for tumor size at time of excision; Supplementary Fig. 1a-c).  
538 Approximately nine weeks after excision of the primary tumor, brain and lung metastatic  
539 burden (i.e. mCherry expression) were quantified. CpG-C treatment significantly reduced the  
540 overall metastatic burden in the brain ( $n=9$  and 12 for control and CpG-C, respectively;  
541  $p=0.0345$ ; Fig. 1g). Notably, in the lungs (as in the primary tumor) CpG-C treatment had no



542 effect ( $p=0.7858$ ; Supplementary Fig. 1d), suggesting that the beneficial effects of CpG-C in  
543 the brain were not secondary to generic or peripheral effects on tumor burden. These results  
544 provide direct evidence that systemic prophylactic CpG-C treatment during the perioperative  
545 period can reduce metastatic growth in the brain.

546

### 547 **Prophylactic CpG-C is effective in reducing tumor seeding in the brain in a variety of** 548 **treatment settings**

549 In the subsequent experiments, we aimed to pinpoint mechanisms underlying the beneficial  
550 effects of CpG-C. We focused on the first 24 hours of tumor colonization in the brain, for the  
551 following reasons: (i) a single administration of CpG-C, that we herein found effective, is  
552 known to exert immune activation within hours and for up to 72 hours (11); (ii)  
553 bioluminescence imaging indicated a non-significant trend for beneficial effects a day  
554 following tumor inoculation (data not shown); and (iii) tumor cells successfully proliferate to  
555 macrometastases only if they extravasate into the brain parenchyma within the first three  
556 days (46). To maximize our ability to focus on the first days following CpG-C administration,  
557 we administered syngeneic D122 tumor cells in C57BL/6J mice, employing the aECAi  
558 approach (32), known for its high temporal inoculation efficiency. We assessed brain tumor  
559 seeding, measuring radioactive signals of isotope-labeled tumor cells within an entire  
560 excised organ – an approach that allows maximal signal-to-noise sensitivity.

561 A single prophylactic injection of CpG-C resulted in reduced brain tumor retention, similarly  
562 in males and females (Supplementary Fig. 2a), and young, juvenile, and old mice  
563 (Supplementary Fig. 2b). While CpG-C was effective in reducing brain tumor retention  
564 already at a dose of 1.2mg/kg ( $p=0.0455$ ), its efficacy increased at 4mg/kg ( $p=0.0003$ ;  
565 Supplementary Fig. 2c) – a dose we previously showed as beneficial in reducing peripheral  
566 metastases (39). In the clinical setting, a prophylactic treatment should rely on a chronic  
567 schedule, and therefore, we tested whether a regime of five injections of CpG-C given every  
568 other day has similar effects as a single injection, and does not result in tolerance to the  
569 effects of the agent. Indeed, CpG-C treatment resulted in reduced tumor retention  
570 ( $p=0.0001$ ; Supplementary Fig. 2d), following both the acute ( $n=6$ ;  $p=0.0298$ ) and the  
571 chronic ( $n=6$ ;  $p=0.0013$ ) treatments, compared to control animals ( $n=6$ ). Notably, single and  
572 multiple CpG-C injections were well tolerated, as indicated by a lack of weight loss  
573 compared to control animals ( $n=6$ ;  $p=0.2593$ ; Supplementary Fig. 2e), in line with previous  
574 reports (11). These data suggest that CpG-C is efficient both as an acute and as a chronic  
575 prophylactic treatment for brain metastasis, in both sexes and across ages, affecting early  
576 stages of tumor cell seeding.

577

578 **NK cells and macrophages are not involved in the metastatic process in the brain, nor**  
579 **mediate the beneficial effects of CpG-C**

580 It has previously been shown that CpG-ODNs have beneficial effects in the periphery,  
581 reducing seeding of tumor cells, and their subsequent growth. These anti-tumor effects were  
582 found to be mediated by NK cells (12,47) and macrophages (10). To study *in vivo* whether  
583 these leukocytes also take part in the metastatic process in the brain and mediate the effects  
584 of CpG-C, we depleted NK cells and monocytes/macrophages using anti-NK1.1 and  
585 clodronate liposomes, respectively (Fig. 2). In the lungs, NK depletion resulted in a 5-fold  
586 increase in tumor retention ( $p=0.0001$ ), and partially blocked the beneficial effects of CpG-C  
587 ( $p=0.0038$ ; Fig. 2a) evident in naïve animals ( $p=0.0019$ ) (in line with previous results (48)). In  
588 contrast, in the brains of the same animals NK depletion did not affect tumor retention  
589 ( $p=0.3935$ ), nor did it mediate the beneficial effects of CpG-C ( $p=0.0811$ ; Fig. 2b), evident in  
590 both naïve ( $p<0.0001$ ) and NK-depleted animals ( $p=0.0056$ ). Similarly, depletion of  
591 monocytes increased lung ( $p=0.0401$ ; Fig. 2c), but not brain tumor retention ( $p=0.3081$ ; Fig.  
592 2d), while the effects of CpG-C were not mediated by monocytes in the lungs ( $p=0.0003$ ) or  
593 in the brain ( $p=0.0001$ ). These findings demonstrate that NK cells and  
594 monocytes/macrophages play a key role in the metastatic process in the lungs, but not in the  
595 brain, nor do they mediate the beneficial effects of CpG-C in the brain.

596

597 **CpG-C is taken up by cerebral cells without disrupting blood-brain barrier integrity**

598 As peripheral innate immune cells do not seem to mediate the effects of CpG-C, we turned  
599 to evaluate the role of CNS cells that express TLR9 (23,49). We focused on cells that are  
600 known to play key roles in the metastatic process, including endothelial cells, astrocytes, and  
601 microglia (50). First, to evaluate whether CpG-C can cross the BBB and affect cerebral  
602 components, we systemically administered mice with TAMRA- or FITC-conjugated CpG-C.  
603 Twenty-four hours later we analyzed CpG-C uptake by brain endothelia, astrocytes, and  
604 microglia, in histological sections (Fig. 3a) and using ImageStream FACS analysis (see  
605 methods; Fig. 3b). Approximately 74% of endothelial cells, 58% of astrocytes, and 62% of  
606 microglia cells internalized CpG-C ( $n=4$  mice; Fig. 3b). This internalization is expected, as  
607 TLR9 ligands are internalized into the cell to bind with the endosomal receptors (51). Indeed,  
608 lysosomal staining of microglia extracted from CpG-C-TAMRA treated animals indicated  
609 CpG-C is internalized into the lysosomes (Supplementary Fig. 5b).

610 For malignant cells to infiltrate into the brain parenchyma, they must cross the BBB.  
611 Endothelial cells connected by tight junction act as the first physical barrier, preventing  
612 uncontrolled infiltration of blood-borne cells. As endothelial cells uptake CpG-C (Fig. 3a,b),  
613 we sought to test whether it had an effect on BBB permeability and integrity. To this end, we  
614 measured Biocytin-TMR and IgG infiltration and continuity of Claudin-5 (tight junctions) in



615 animals expressing GFP under the Claudin-5 promoter. CpG-C did not affect Biocytin-TMR  
616 of IgG infiltration ( $\geq 5$  images were averaged in 4 anatomical regions in 3 mice –  $n=12$ ; Fig.  
617 4a,b Supplementary Fig. 4a-c), nor continuity of Claudin-5 (Fig. 4c, Supplementary Fig. 4d).  
618 Furthermore, no infiltration of immune cells (i.e.  $CD4^+$  or  $CD68^+$ ) was evident following CpG-  
619 C treatment (Fig. 4d). Thus, these results strongly suggest that the effects of CpG-C on  
620 tumor seeding in the brain are not mediated by perturbations to the BBB or the choroid  
621 plexus.

622

### 623 **Microglia, but not astrocytes, mediate anti-tumor beneficial effects of CpG-C**

624 Astrocytes (52) and microglia (53) have key roles in innate and adaptive immunity, and  
625 combined with their significant uptake of CpG-C (Fig. 3ab and Supplementary Fig. 5a), they  
626 were our primary candidates for mediating the effects of this agent. Therefore, we  
627 investigated their *in vitro* capacity to induce tumor cell lysis and the impact of pre-stimulation  
628 with CpG-C. Primary astrocytic cultures were treated with CpG-C or non-CpG ODN, and  
629 tested for their ability to induce tumor cell lysis by contact or by secretion of apoptosis-  
630 inducing factors. The cultured astrocytes did not induce tumor cell death, with or without  
631 CpG-C treatment, in both contact and secretion conditions (Fig. 5a,b). In contrast, primary  
632 microglial cells induced cytotoxicity in D122 tumor cells, and CpG-C treatment markedly  
633 increased this lysis when tumor cells were in contact (Fig. 5c), while their conditioned-media  
634 alone had no effect (Fig. 5d). We further extended this testing in the N9 immortalized  
635 microglia cell line. Similar to the effects observed in the primary microglia culture, N9 cells  
636 reduced tumor cell viability when in contact (Fig. 5e), but failed to do so in a paracrine  
637 setting (Fig. 5f,g). To study whether non-CpG ODN impacted the tumoricidal activity of N9  
638 cells, we repeated the contact co-culture experiment with an additional group of PBS-treated  
639 N9 cultures (Supplementary Fig. 6b). We found PBS and non-CpG ODN treatments to have  
640 a similar affect ( $p=0.7745$  and  $p=0.1420$  for  $16 \times 10^3$  and  $32 \times 10^3$  D122 cells/well), while CpG-  
641 C significantly reduced tumor cells viability (for  $16 \times 10^3$ :  $p=0.0017$  and  $p=0.0062$  compared to  
642 PBS and non-CpG ODN, respectively, and for  $32 \times 10^3$ :  $p=0.0003$  and  $p=0.0477$  compared to  
643 PBS and non-CpG ODN, respectively). Next, we studied the mechanisms by which microglia  
644 cells eradicate D122 tumor cells. We found that N9 cells treated with CpG-C induced  
645 apoptosis in tumor cells, as indicated by increased annexin V staining (Fig. 5h). Additionally,  
646 CpG-C treatment resulted in a 3-fold elevation in phagocytosis capacity (Fig. 5i), in line with  
647 previous reports (27). Notably, it appears that the effect of CpG-C on microglia activity is not  
648 a general activation, as we found no effects of the agent in a scratch migration assay (54)  
649 ( $n=9$ ;  $p=0.6732$  for wound confluency, and  $p=0.6039$  for wound width; and also *in vivo* as  
650 described below, Supplementary Fig. 7a). Taken together, these findings indicate that

651 contact between microglia and tumor cells is essential for the effects induced by CpG-C. A  
652 combination of elevated microglial cytotoxicity and enhanced phagocytic capacity underline  
653 these effects.

654

### 655 **Microglia mediate the beneficial effects of CpG-C *in vivo***

656 We found that CpG-C affects brain tumor retention as early as 24 hours post tumor cell  
657 inoculation. Interactions between microglia and tumor cells at early stages of tumor cell  
658 extravasation have been reported elsewhere (55). However, the significance of these  
659 interactions with respect to microglial tumoricidal characteristics at this time point, is yet  
660 unknown. To this end, we first established that microglia indeed phagocytize tumor cells at  
661 this early time point. Longitudinal intravital imaging revealed that microglia cells interact with  
662 tumor cells, and initiate phagocytic processes, as early as a few hours after tumor cell  
663 inoculation (Fig. 6a-c). To assess the effects of CpG-C on this phagocytic capacity,  
664 CX3CR1<sup>GFP/+</sup> mice were injected with CpG-C or CpG non-ODN, and 24 hours later injected  
665 with either tdTomato-labeled or mCherry-labeled D122 tumor cells for two-photon or  
666 ImageStream FACS analysis, respectively. The number of microglia-tumor cells contacts  
667 and microglia internalization of mCherry particles (originated from tumor cells) were  
668 quantified four hours following tumor cells inoculation and at days one, four, and seven  
669 thereafter (Fig. 6d,e). As early as four hours following tumor cells inoculation there were  
670 more contacts between microglia and tumor cells in CpG-C treated animals ( $p=0.0128$ ), with  
671 no differences at later times. Moreover, the number of internalization events CpG-C treated  
672 animals were higher four hours ( $p=0.0372$ ) and one day ( $p=0.0041$ ) following tumor cell  
673 inoculation. No differences were evident at days four and seven, probably due to the  
674 dismantling process of the tumor cells evident as early as two days following tumor cell  
675 inoculation (Fig. 6a). Using ImageStream FACS analysis 24 hours after tumor inoculation,  
676 we found first that CpG-C did not affect the total number of microglia in the brain ( $n=5$ ;  
677  $p=0.4201$ ; Fig. 6f), nor the total number of infiltrating tumor cells ( $p=0.3455$ ; Fig. 6g), in  
678 accordance with our above findings regarding the lack of CpG-C impact on BBB  
679 permeability. However, CpG-C increased phagocytosis of tumor cells by microglia  
680 ( $p=0.0055$ ; Fig. 6h). These results alone do not specify whether CpG-C increases the killing  
681 of tumor cells by microglia, or whether it merely increases endocytosis of tumor debris by  
682 microglia. To distinguish between these alternatives, we turned to a set of experiments  
683 where microglia activation was impaired or where microglia were depleted from the brain  
684 and quantified the ability of CpG-C to reduce the total amount of live tumor cells, by  
685 assessing radioactive signaling that originated from radio-labeled tumor cells. Employing this  
686 approach, animals were treated with minocycline, an inhibitor of microglial activation (40,56)  
687 (Fig. 7a), which resulted in a significantly increased brain tumor retention ( $p=0.0118$ ), without

688 affecting the total number of infiltrating tumor cells (see below). Importantly, CpG-C  
689 treatment reduced tumor retention in naïve mice ( $p < 0.0001$ ), but not in minocycline-treated  
690 animals ( $p = 0.1863$ ). Moreover, the effects of CpG-C were completely blocked by  
691 minocycline treatment ( $p < 0.0001$ ), indicating the mediating role of microglia in the beneficial  
692 effects of CpG-C. To further validate these significant results, animals were treated with  
693 CpG-C, or with minocycline and CpG-C, and mCherry (tumor cells) uptake by microglia was  
694 quantified using ImageStream FACS analysis, and compared to saline-treated animals (Fig.  
695 7b). In line with the radioactive-based quantification, CpG-C increased tumor cell  
696 phagocytosis (i.e. events where the mCherry signal could be identified inside GFP-positive  
697 segmented objects;  $p = 0.0100$ ), and this effect was blocked by minocycline ( $p = 0.0493$ ).  
698 Notably, infiltration capacity of tumor cells was not affected by minocycline treatment, as  
699 indicated by total area of mCherry (i.e. all detection events combined) in the brain  
700 ( $p = 0.8994$ ). Depletion of all microglia (activated and non-activated) with PLX5622 (41), a  
701 colony-stimulating factor 1 receptor (CSF1R) inhibitor, blocked the beneficial effects of CpG-  
702 C ( $p = 0.0068$ ), again indicating the mediating role of microglia. Microglia depletion alone did  
703 not affect tumor retention in brains of naïve animals ( $p = 0.7490$ ; Fig. 7c).  
704 Given our *in vitro* and *in vivo* results, we predicted that CpG-C administration would result in  
705 elevated expression of apoptosis- and phagocytosis-related factors by microglia cells. We  
706 therefore performed transcriptional analysis of microglia cells isolated from CpG-C treated,  
707 or control, animals (Fig 8a). We revealed a robust impact of the agent on the induction of  
708 mRNA encoding of apoptosis-inducing, phagocytosis related, and inflammatory factors,  
709 while not affecting the inflammation-independent microglial marker *Tmem119* (57)  
710 ( $p = 0.7258$ ; Fig. 8a). Specifically, mRNA expression of the key apoptosis-inducing ligands,  
711 *Tnfsf10* and *Fasl*, increased by 3-4-fold in microglia from CpG-C-treated animals ( $p = 0.0252$   
712 and  $p = 0.0324$ , respectively; Fig. 8b). In addition, CpG-C treatment resulted in increased  
713 expression of receptors related to phagocytosis (58), including, CD47 ( $p = 0.0186$ ) and *Trem2*  
714 ( $p = 0.0199$ ), while *Cd36* and *Cd68* mRNA expression levels did not change ( $p = 0.7080$  and  
715  $p = 0.9874$ , respectively; Fig. 8c). *Marco* (macrophage receptor with collagenous structure),  
716 another important phagocytosis receptor (59), was not detected in microglia of control  
717 animals, yet it was highly expressed in CpG-C-treated animals ( $p = 0.0108$ ; Fig. 8c). While  
718 mRNA of the inflammatory cytokines *Il-6* and *Il-1 $\beta$*  was not affected by CpG-C treatment  
719 ( $p = 0.9690$  and  $p = 0.6772$ , respectively), *Tnf* and *Inf- $\gamma$* , which are known to synergistically  
720 induce apoptosis in tumor cells (54), were increased by approximately two- and seven-fold,  
721 respectively ( $p = 0.0163$  and  $p = 0.0374$ , respectively; Fig. 8d). mRNA of nitric oxide synthase  
722 2 (*Nos2*), an inflammation-associated enzyme with tumoricidal properties at high  
723 concentrations (60), was not detected in control animals, while abundantly expressed in  
724 CpG-C treated animals ( $p = 0.0203$ ; Fig. 8d). Irrespectively, and in line with our *in vitro*

725 results, CpG-C did not affect microglia reaction to a non-tumor-related stimulus *in vivo* (i.e.  
726 laser induced photodamage;  $p=0.7474$ ; Supplementary Fig. 7b). Overall, these *in vivo*  
727 findings strengthen the notion that prophylactic treatment with CpG-C is beneficial in  
728 reducing brain metastasis, by triggering non-activated microglia cells to adopt tumoricidal  
729 characteristics.

730

### 731 **Discussion**

732 Brain metastasis is a detrimental manifestation of cancer progression with limited  
733 treatments; and a better understanding of this process is expected to improve therapeutic  
734 interventions. Here, employing three tumor models, we report that prophylactic systemic  
735 treatment with CpG-C, a TLR9 agonist, exerts beneficial effects through reducing tumor cell  
736 seeding and growth in the brain. Notably, NK cells and monocytes did not mediate anti-  
737 metastatic processes in the brain, nor the beneficial effects of CpG-C, in contrast to their  
738 important role in the periphery (shown also here in the lungs). Instead, we identify microglia  
739 as key mediators of these beneficial effects in the initial steps of metastatic brain  
740 colonization. Moreover, we show that activation of microglia is essential for its anti-  
741 metastatic function. Thus, CpG-C stimulates microglia to adopt anti-tumor characteristics,  
742 inducing tumor apoptosis and phagocytosis, thereby reducing the formation of brain  
743 metastases.

744

745 Systemic treatment against brain metastasis has been proposed as a first therapeutic choice  
746 (2,4,61), but no effective clinical routine is yet available. A previous study indicated that  
747 systemic administration of a CpG-ODN can result in altered cerebral mRNA expression  
748 profile (62) suggesting that the agent could have reached this organ. Furthermore, CpG-  
749 ODN was shown to stimulate BV2 microglia cells *in vitro* (63), and intracranial injection of  
750 CpG-ODN resulted in activation of microglia cells *in vivo* (64). However, there was no direct  
751 *in vivo* evidence demonstrating that such an agent could enter the brain parenchyma if  
752 administered systemically and elicit a beneficial effect, fundamental requirements for a  
753 prophylactic treatment in cancer patients. Notably, direct intracranial injection of tumor cells  
754 or CPG-ODN (or any other agent) alter the neuro-immune environment by eliciting an  
755 inflammatory response (65), thus, interpreting the role of immune cells in these settings in  
756 less straightforward. We overcome these technical hurdles and show here, for the first time,  
757 that following systemic administration (i.e. intraperitoneally) CpG-C was abundantly taken up  
758 by TLR9-expressing cells across the brain, without affecting BBB integrity or infiltration of  
759 immune cells into the brain (Fig. 4, Supplementary Fig. 4), and dramatically reduced brain  
760 colonization by circulating tumor cells (Figs. 1,2,6,7, Supplementary Figs. 2,6). These  
761 findings pave the road for exploiting this compound in the clinic, as it could be easily

762 administered systemically to serve as a prophylactic agent for patients with high risk of  
763 developing brain metastases.

764

765 An even more urgent clinical scenario where this treatment could prove life-saving is the  
766 perioperative period –days to weeks before and after tumor excision– which is now  
767 acknowledged as a critical therapeutic window for reducing post-operative metastatic  
768 disease (14,66). Indeed, various short perioperative interventions were reported to markedly  
769 impact short- and long-term cancer outcomes (14,67–69). As brain metastases are common  
770 in cancer patients and are associated with poor prognosis (1), reducing their post-operative  
771 occurrence is key in improving survival (4). Here, we show that in a spontaneous brain  
772 metastasis model of melanoma, a short perioperative treatment with CpG-C, spanning three  
773 days prior and following primary tumor excision, results in reduced brain tumor burden (Fig.  
774 1g). Importantly, CpG-C was shown to have negligible toxicity in humans (19–21). While we  
775 did not directly test whether systemic CpG-C administration has any deleterious effects on  
776 neuronal activity, it has been shown by others that when administered directly into the brain  
777 (resulting in higher local concentrations) CpG-ODNs do not cause neurotoxicity in animals  
778 (27), nor result in significant or permanent neurological deficits in humans (19–21).  
779 Therefore, while traditional chemo and radiation therapies cannot be used during the  
780 perioperative period (due to their deleterious effects on tissue healing and immune  
781 competence), the use of CpG-C could be a promising prophylactic approach during this  
782 critical timeframe (14).

783 In pre-clinical trials, acute and chronic systemic CpG-ODNs (including CpG-C) were shown  
784 to reduce primary tumor growth and metastases in peripheral organs (10–12,70).  
785 Importantly, CpG-ODNs are evaluated as stand-alone anti-tumor agents as well as vaccine  
786 adjuvants in several clinical trials of different cancers, and systemic administration is  
787 considered well tolerated with negligible toxicity (71,72). Given the low toxicity of CpG-C and  
788 its wide-range anti-tumor effects, extended use beyond the perioperative period can also be  
789 considered. Additionally, TLR9 stimulation of microglia cells has also been shown to be  
790 beneficial in various neurological pathologies, including Alzheimer's (26) and seizure-  
791 induced aberrant neurogenesis (28), although systemic treatment has not been studied for  
792 these conditions. As such, systemic CpG-C treatment could be considered as a therapeutic  
793 intervention for cancer and non-cancer-related pathologies.

794 It is well established that innate immune cells play a key role in preventing and eradicating  
795 metastases in the periphery (73–75). Indeed, we herein show that depletion of NK cells and  
796 monocytes results in elevated tumor-seeding in the lungs (Fig. 2a,c). However, in the brains



797 of the same animals, we made the novel observation that NK and monocyte depletion has  
798 no effect, and that they do not mediate the beneficial effects of CpG-C (Fig. 2b,d). While  
799 mature NK cells are abundant in the capillaries of the lungs and liver (76), only limited  
800 numbers of immature NK cells are found in cerebral capillaries (77). Also, while patrolling  
801 monocytes (21) and pulmonary-resident macrophages are the first line of defense in the  
802 lungs (78), monocytes infiltrate the brain parenchyma only under pathological conditions in  
803 which the BBB is compromised (79,80), a condition that does not characterize the early  
804 stages of tumor cell infiltration (81). Notably, systemic CpG-C administration did not affect  
805 infiltration of T-cells (i.e. CD4<sup>+</sup>) or monocytes (i.e. CD68<sup>+</sup>) into the brain (Fig. 4d), or the  
806 number of GFP<sup>+</sup> cells (i.e. monocytes/microglia) evident in the brain twenty-four hours  
807 following administration of tumor cells (Fig.6f). These differences between the periphery and  
808 the brain underscore the importance of studying brain-specific mechanisms that regulate the  
809 metastatic process, to allow tailoring of relevant therapies.

810

811 In the brain, microglia are the primary immune effector cells (53). Close interactions between  
812 macrophages/microglia cells and established metastases has been reported in human brain  
813 samples (82,83). In mice, it has been shown that heterogeneous microglia cells, activated  
814 and non-activated, accumulate proximal to invading tumor cells (55) and infiltrate  
815 established metastases generated by intracranial injection (84). However, the role of  
816 microglia in regulating brain tumor progression, especially during the initial steps of tumor  
817 colonization, remains unclear (83,85–88). Notably, established tumors can modulate  
818 activation of microglia, recruiting them to support tumor progression, whereas enabling  
819 microglia activation has an opposite effect (87–90). Our *in vitro* results indicate that both  
820 primary cultured and N9 microglia cells exert low tumoricidal activity (Fig. 5), in line with  
821 previous findings (91). Here, however, we clearly show that activation of microglia with CpG-  
822 C markedly increases this cytotoxic activity, mediated through direct physical contact with  
823 tumor cells and not in a paracrine fashion. While it has been argued that microglia cells  
824 promote initial steps of colonization of breast tumor cells *in vitro* and in acute slices (83), we  
825 found through *in vivo* two-photon imaging that microglia contact and phagocytize tumor cells  
826 immediately after their infiltration into the brain (Fig. 6a-c), and do so more abundantly  
827 following systemic administration of CpG-C (Fig. 6d,e). Accordingly, CpG-C increased  
828 mRNA expression of apoptosis-inducing and phagocytosis-related genes in microglia (Fig.  
829 8), without affecting microglia density (Fig. 6f). Further, by blocking microglia activation (Fig.  
830 7a,b), and by depleting them (Fig. 7c), we show that microglia mediate the beneficial *in vivo*  
831 anti-metastatic effects of CpG-C.

832

833 The metastatic process involves several steps, including arrest in the brain vasculature,  
834 infiltration through the BBB (mainly) and colonization of the brain parenchyma (92). Although  
835 CpG-C could have affected all of these steps in different magnitudes as endothelial cells and  
836 astrocytes also uptake the adjuvant (Fig. 3), we clearly show that the pool of metastatic cells  
837 infiltrating the brain was not altered (Fig. 6g) leading to the conclusion that, even if not  
838 directly measured, arrest and infiltration were not significantly affected by CpG-C. Support  
839 for this argument comes also from our findings that the permeability of key brain-immune  
840 interfaces was not altered (Fig. 4 and Supplementary Fig. 4). This conclusion does not  
841 overrule contribution of other mediators, which will become the topic of future research.

842

843 Overall, we demonstrate that shifting the balance from non-activated to activated microglia,  
844 as with the systemic CpG-C treatment presented herein, results in killing of invading tumor  
845 cells and prevents establishment of brain metastases. Such an approach could lay the  
846 foundation for a novel clinical perioperative therapy.

847

848

#### 849 **Acknowledgement**

850 This study was supported by a NIH/NCI R01 CA172138 (SBE) and the Leducq Foundation –  
851 Protect Stroke 15CVD02 (PB). AB is grateful to Dante family and Sagol School of  
852 Neuroscience of Tel Aviv University for the award of doctoral fellowship. NE wants to  
853 acknowledge support from the Melanoma Research Alliance (the Saban Family Foundation–  
854 MRA Team Science Award). The authors thank Reuven Stein and Uri Amit for commenting  
855 on early versions of this manuscript.

856

#### 857 **Author Contributions**

858 Conceptualization, A.B., L.M., S.B-E. and P.B.; Methodology, A.B., A.C., S.B-E. and P.B.;  
859 Software, P.B.; Investigation, A.B., M.G., A.L., D.K., A.C., M.A., and L.S.; Resources, A.G.;  
860 Writing – Original Draft, A.B., S.B-E. and P.B.; Writing – Review & Editing, A.B., M.G., M.A.,  
861 N.E., L.M., S.B-E., and P.B.; Visualization, A.B. and P.B.; Supervision, N.E., D.A., L.M., S.B-  
862 E., P.B.

863

#### 864 **Declaration of Interests**

865 The authors declare no competing interests.

866

#### 867 **References**

- 868 1. Steeg PS, Camphausen KA, Smith QR. Brain metastases as preventive and  
869 therapeutic targets. Nat Rev Cancer [Internet]. Nature Publishing Group; 2011 May 7  
870 [cited 2017 Jun 15];11(5):352–63. Available from:

- 871 <http://www.nature.com/doi/10.1038/nrc3053>
- 872 2. Lin X, DeAngelis LM. Treatment of Brain Metastases. *J Clin Oncol* [Internet].  
873 American Society of Clinical Oncology; 2015 Oct 20 [cited 2017 Jun 15];33(30):3475–  
874 84. Available from: <http://ascopubs.org/doi/10.1200/JCO.2015.60.9503>
- 875 3. Kim S-WS, Kim J-S, Park ES, Lee J-S, Lin Q, Langley RR, et al. Astrocytes  
876 upregulate survival genes in tumor cells and induce protection from chemotherapy.  
877 *Neoplasia* [Internet]. 2011 Mar [cited 2017 Nov 3];13(3). Available from:  
878 <http://www.ncbi.nlm.nih.gov/pubmed/21390191>
- 879 4. Kienast Y, Winkler F. Therapy and prophylaxis of brain metastases. *Expert Rev*  
880 *Anticancer Ther* [Internet]. 2010 Nov;10(11):1763–77. Available from:  
881 <http://www.ncbi.nlm.nih.gov/pubmed/21080803>
- 882 5. Kodack DP, Askoxylakis V, Ferraro GB, Fukumura D, Jain RK. Emerging Strategies  
883 for Treating Brain Metastases from Breast Cancer. *Cancer Cell* [Internet]. NIH Public  
884 Access; 2015 Feb 9 [cited 2018 Mar 3];27(2):163–75. Available from:  
885 <http://www.ncbi.nlm.nih.gov/pubmed/25670078>
- 886 6. O'Neill LAJ, Hennessy EJ, Parker AE. Targeting Toll-like receptors: Emerging  
887 therapeutics? *Nat Rev Drug Discov* [Internet]. Nature Publishing Group; 2010 Apr  
888 [cited 2017 Jun 6];9(4):293–307. Available from:  
889 <http://www.nature.com/doi/10.1038/nrd3203>
- 890 7. Krieg AM. Toll-like receptor 9 (TLR9) agonists in the treatment of cancer. *Oncogene*  
891 [Internet]. Nature Publishing Group; 2008 [cited 2017 Jun 6];27(2):161. Available  
892 from: <http://www.nature.com.rproxy.tau.ac.il/onc/journal/v27/n2/full/1210911a.html>
- 893 8. Krieg AM. Therapeutic potential of Toll-like receptor 9 activation. *Nat Rev Drug Discov*  
894 [Internet]. Nature Publishing Group; 2006 Jun [cited 2017 Jun 6];5(6):471–84.  
895 Available from: <http://www.nature.com/doi/10.1038/nrd2059>
- 896 9. Sfondrini L, Sommariva M, Tortoreto M, Meini A, Piconese S, Calvaruso M, et al. Anti-  
897 tumor activity of CpG-ODN aerosol in mouse lung metastases. *Int J Cancer* [Internet].  
898 2013 Jul 15 [cited 2017 Jun 13];133(2):383–93. Available from:  
899 <http://doi.wiley.com/10.1002/ijc.28028>
- 900 10. Guiducci C, Vicari AP, Sangaletti S, Trinchieri G, Colombo MP. Redirecting in vivo  
901 elicited tumor infiltrating macrophages and dendritic cells towards tumor rejection.  
902 *Cancer Res* [Internet]. 2005 Apr 15 [cited 2017 Jun 13];65(8):3437–46. Available  
903 from: <http://www.ncbi.nlm.nih.gov/pubmed/15833879>
- 904 11. Goldfarb Y, Benish M, Rosenne E, Melamed R, Levi B, Glasner A, et al. CpG-C  
905 oligodeoxynucleotides limit the deleterious effects of  $\beta$ -adrenoceptor stimulation on  
906 NK cytotoxicity and metastatic dissemination. *J Immunother* [Internet]. 2009 Apr [cited  
907 2017 Oct 27];32(3):280–91. Available from:  
908 <http://www.ncbi.nlm.nih.gov/pubmed/19242372>
- 909 12. Sorski L, Melamed R, Matzner P, Lavon H, Shaashua L, Rosenne E, et al. Reducing  
910 liver metastases of colon cancer in the context of extensive and minor surgeries  
911 through  $\beta$ -adrenoceptors blockade and COX2 inhibition. *Brain Behav Immun*  
912 [Internet]. 2016 Nov [cited 2017 Oct 27];58:91–8. Available from:  
913 <http://www.ncbi.nlm.nih.gov/pubmed/27235931>



- 914 13. Levi B, Matzner P, Goldfarb Y, Sorski L, Shaashua L, Melamed R, et al. Stress  
915 impairs the efficacy of immune stimulation by CpG-C: Potential neuroendocrine  
916 mediating mechanisms and significance to tumor metastasis and the perioperative  
917 period. *Brain Behav Immun* [Internet]. 2016 Aug [cited 2017 Jun 13];56:209–20.  
918 Available from: <http://linkinghub.elsevier.com/retrieve/pii/S0889159116300459>
- 919 14. Horowitz M, Neeman E, Sharon E, Ben-Eliyahu S. Exploiting the critical perioperative  
920 period to improve long-term cancer outcomes. *Nat Rev Clin Oncol* [Internet]. Nature  
921 Publishing Group, a division of Macmillan Publishers Limited. All Rights Reserved.;  
922 2015 Apr [cited 2016 Mar 20];12(4):213–26. Available from:  
923 <http://dx.doi.org/10.1038/nrclinonc.2014.224>
- 924 15. Nayak L, Lee EQ, Wen PY. Epidemiology of brain metastases. *Curr Oncol Rep*  
925 [Internet]. 2012 Feb 20 [cited 2017 Jun 4];14(1):48–54. Available from:  
926 <http://www.ncbi.nlm.nih.gov/pubmed/22012633>
- 927 16. Yang GY, Matthews RH. Prophylactic cranial irradiation in small-cell lung cancer.  
928 *Oncologist* [Internet]. AlphaMed Press; 2000 Aug 1 [cited 2018 May 24];5(4):293–8.  
929 Available from: <http://www.ncbi.nlm.nih.gov/pubmed/10964996>
- 930 17. Quan AL, Videtic GMM, Suh JH. Brain metastases in small cell lung cancer. *Oncology*  
931 (Williston Park) [Internet]. 2004 Jul [cited 2018 May 24];18(8):961-972; discussion  
932 974, 979–80, 987. Available from: <http://www.ncbi.nlm.nih.gov/pubmed/15328892>
- 933 18. Giordano FA, Welzel G, Abo-Madyan Y, Wenz F. Potential toxicities of prophylactic  
934 cranial irradiation. *Transl Lung Cancer Res* [Internet]. AME Publications; 2012 Dec  
935 [cited 2017 Dec 30];1(4):254–62. Available from:  
936 <http://www.ncbi.nlm.nih.gov/pubmed/25806190>
- 937 19. Ursu R, Carpentier A, Metellus P, Lubrano V, Laigle-Donadey F, Capelle L, et al.  
938 Intracerebral injection of CpG oligonucleotide for patients with de novo  
939 glioblastoma? A phase II multicentric, randomised study. *Eur J Cancer* [Internet]. 2017  
940 Mar [cited 2017 Jun 13];73:30–7. Available from:  
941 <http://www.ncbi.nlm.nih.gov/pubmed/28142059>
- 942 20. Carpentier A, Metellus P, Ursu R, Zohar S, Lafitte F, Barrié M, et al. Intracerebral  
943 administration of CpG oligonucleotide for patients with recurrent glioblastoma: A  
944 phase II study. *Neuro Oncol* [Internet]. 2010 Apr 1 [cited 2017 Jun 14];12(4):401–8.  
945 Available from: [https://academic.oup.com/neuro-oncology/article-  
946 lookup/doi/10.1093/neuonc/nop047](https://academic.oup.com/neuro-oncology/article-lookup/doi/10.1093/neuonc/nop047)
- 947 21. Carpentier A, Laigle-Donadey F, Zohar S, Capelle L, Behin A, Tibi A, et al. Phase 1  
948 trial of a CpG oligodeoxynucleotide for patients with recurrent glioblastoma1. *Neuro*  
949 *Oncol* [Internet]. 2006 Jan [cited 2017 Jun 14];8(1):60–6. Available from:  
950 <http://www.ncbi.nlm.nih.gov/pubmed/16443949>
- 951 22. El Kebir D, Jozsef L, Pan W, Wang L, Filep JG. Bacterial DNA Activates Endothelial  
952 Cells and Promotes Neutrophil Adherence through TLR9 Signaling. *J Immunol*  
953 [Internet]. 2009 Apr 1 [cited 2017 Apr 25];182(7):4386–94. Available from:  
954 <http://www.ncbi.nlm.nih.gov/pubmed/19299739>
- 955 23. Hanke ML, Kielian T. Toll-like receptors in health and disease in the brain:  
956 mechanisms and therapeutic potential. *Clin Sci* [Internet]. NIH Public Access; 2011  
957 Nov [cited 2017 Jun 6];121(9):367–87. Available from:  
958 <http://www.ncbi.nlm.nih.gov/pubmed/21745188>

- 959 24. Bahjat FR, Williams-Karnesky RL, Kohama SG, West GA, Doyle KP, Spector MD, et  
960 al. Proof of concept: Pharmacological preconditioning with a Toll-like receptor agonist  
961 protects against cerebrovascular injury in a primate model of stroke. *J Cereb Blood*  
962 *Flow Metab* [Internet]. 2011 May [cited 2017 Jun 13];31(5):1229–42. Available from:  
963 <http://journals.sagepub.com/doi/10.1038/jcbfm.2011.6>
- 964 25. Franklin BS, Ishizaka ST, Lamphier M, Gusovsky F, Hansen H, Rose J, et al.  
965 Therapeutic targeting of nucleic acid-sensing Toll-like receptors prevents  
966 experimental cerebral malaria. *Proc Natl Acad Sci* [Internet]. 2011 Mar 1 [cited 2017  
967 Jun 13];108(9):3689–94. Available from:  
968 <http://www.ncbi.nlm.nih.gov/pubmed/21303985>
- 969 26. Scholtzova H, Chianchiano P, Pan J, Sun Y, Goñi F, Mehta PD, et al. Amyloid  $\beta$  and  
970 Tau Alzheimer's disease related pathology is reduced by Toll-like receptor 9  
971 stimulation. *Acta Neuropathol Commun* [Internet]. 2014;2(1):101. Available from:  
972 <http://www.actaneurocomms.org/content/2/1/101%5Cnhttp://www.pubmedcentral.nih.gov/articlerender.fcgi?artid=4171548&tool=pmcentrez&rendertype=abstract>  
973
- 974 27. Doi Y, Mizuno T, Maki Y, Jin S, Mizoguchi H, Ikeyama M, et al. Microglia activated  
975 with the toll-Like receptor 9 ligand CpG attenuate oligomeric amyloid  $\beta$  neurotoxicity in  
976 in vitro and in vivo models of Alzheimer's disease. *Am J Pathol* [Internet]. Elsevier;  
977 2009 Nov 1 [cited 2017 Nov 19];175(5):2121–32. Available from:  
978 <http://www.sciencedirect.com/science/article/pii/S0002944010607213>
- 979 28. Matsuda T, Murao N, Katano Y, Juliandi B, Kohyama J, Akira S, et al. TLR9 signalling  
980 in microglia attenuates seizure-induced aberrant neurogenesis in the adult  
981 hippocampus. *Nat Commun* [Internet]. Nature Publishing Group; 2015 Mar 9 [cited  
982 2017 Mar 5];6:6514. Available from:  
983 <http://www.nature.com/doi/10.1038/ncomms7514>
- 984 29. Fan H, Zhang I, Chen X, Zhang L, Wang H, Da Fonseca A, et al. Intracerebral CpG  
985 immunotherapy with carbon nanotubes abrogates growth of subcutaneous  
986 melanomas in mice. *Clin Cancer Res* [Internet]. American Association for Cancer  
987 Research; 2012 Oct 15 [cited 2018 Jul 22];18(20):5628–38. Available from:  
988 <http://www.ncbi.nlm.nih.gov/pubmed/22904105>
- 989 30. Zhao D, Alizadeh D, Zhang L, Liu W, Farrukh O, Manuel E, et al. Carbon nanotubes  
990 enhance CpG uptake and potentiate antiglioma immunity. *Clin Cancer Res*.  
991 2011;17(4):771–82.
- 992 31. El Andaloussi A, Sonabend AM, Han Y, Lesniak MS. Stimulation of TLR9 with CpG  
993 ODN enhances apoptosis of glioma and prolongs the survival of mice with  
994 experimental brain tumors. *Glia*. 2006;54(6):526–35.
- 995 32. Benbenishty A, Segev Amzaleg N, Shaashua L, Melamed R, Ben Eliyahu S, Blinder  
996 P, et al. Maintaining unperturbed cerebral blood flow is key in the study of brain  
997 metastasis and its interactions with stress and inflammatory responses. *Brain Behav*  
998 *Immun* [Internet]. 2017 May [cited 2017 Feb 25];62:265–76. Available from:  
999 <http://www.ncbi.nlm.nih.gov/pubmed/28219803>
- 1000 33. Schwartz H, Blacher E, Amer M, Livneh N, Abramovitz L, Klein A, et al. Incipient  
1001 melanoma brain metastases instigate astrogliosis and neuroinflammation. *Cancer*  
1002 *Res* [Internet]. American Association for Cancer Research; 2016 Aug 1 [cited 2017  
1003 Oct 14];76(15):4359–71. Available from:  
1004 <http://www.ncbi.nlm.nih.gov/pubmed/27261506>

- 1005 34. Saura J, Tusell JM, Serratosa J. High-yield isolation of murine microglia by mild  
1006 trypsinization. *Glia* [Internet]. Wiley Subscription Services, Inc., A Wiley Company;  
1007 2003 Dec [cited 2016 Apr 9];44(3):183–9. Available from:  
1008 <http://doi.wiley.com/10.1002/glia.10274>
- 1009 35. Stansley B, Post J, Hensley K. A comparative review of cell culture systems for the  
1010 study of microglial biology in Alzheimer's disease. *J Neuroinflammation* [Internet].  
1011 BioMed Central; 2012 May 31 [cited 2017 Oct 1];9:115. Available from:  
1012 <http://www.ncbi.nlm.nih.gov/pubmed/22651808>
- 1013 36. Glasner A, Avraham R, Rosenne E, Benish M, Zmora O, Shemer S, et al. Improving  
1014 survival rates in two models of spontaneous postoperative metastasis in mice by  
1015 combined administration of a beta-adrenergic antagonist and a cyclooxygenase-2  
1016 inhibitor. *J Immunol* [Internet]. 2010 Mar 1 [cited 2012 Oct 26];184(5):2449–57.  
1017 Available from: <http://www.ncbi.nlm.nih.gov/pubmed/20124103>
- 1018 37. Knowland D, Arac A, Sekiguchi KJ, Hsu M, Lutz SE, Perrino J, et al. Stepwise  
1019 recruitment of transcellular and paracellular pathways underlies blood-brain barrier  
1020 breakdown in stroke. *Neuron* [Internet]. 2014 May 7 [cited 2017 Sep 30];82(3):603–  
1021 17. Available from: <http://linkinghub.elsevier.com/retrieve/pii/S0896627314001974>
- 1022 38. Gur C, Copenhagen-Glazer S, Rosenberg S, Yamin R, Enk J, Glasner A, et al.  
1023 Natural killer cell-mediated host defense against uropathogenic *E. coli* is counteracted  
1024 by bacterial hemolysinA-dependent killing of NK cells. *Cell Host Microbe* [Internet].  
1025 Elsevier; 2013 Dec 11 [cited 2017 Oct 1];14(6):664–74. Available from:  
1026 <http://www.ncbi.nlm.nih.gov/pubmed/24331464>
- 1027 39. Goldfarb Y, Levi B, Sorski L, Frenkel D, Ben-Eliyahu S. CpG-C immunotherapeutic  
1028 efficacy is jeopardized by ongoing exposure to stress: potential implications for clinical  
1029 use. *Brain Behav Immun* [Internet]. 2011 Jan [cited 2012 Oct 27];25(1):67–76.  
1030 Available from: <http://dx.doi.org/10.1016/j.bbi.2010.07.242>
- 1031 40. Fan R, Xu F, Previti M Lou, Davis J, Grande AM, Robinson JK, et al. Minocycline  
1032 reduces microglial activation and improves behavioral deficits in a transgenic model of  
1033 cerebral microvascular amyloid. *J Neurosci* [Internet]. 2007 Mar 21 [cited 2017 Oct  
1034 2];27(12):3057–63. Available from:  
1035 <http://www.jneurosci.org/cgi/doi/10.1523/JNEUROSCI.4371-06.2007>
- 1036 41. Dagher NN, Najafi AR, Kayala KMN, Elmore MRP, White TE, Medeiros R, et al.  
1037 Colony-stimulating factor 1 receptor inhibition prevents microglial plaque association  
1038 and improves cognition in 3xTg-AD mice. *J Neuroinflammation* [Internet]. BioMed  
1039 Central; 2015 Dec 1 [cited 2017 Oct 21];12(1):139. Available from:  
1040 <http://www.jneuroinflammation.com/content/12/1/139>
- 1041 42. Lutz SE, Smith JR, Kim DH, Olson CVL, Ellefsen K, Bates JM, et al. Caveolin1 Is  
1042 Required for Th1 Cell Infiltration, but Not Tight Junction Remodeling, at the Blood-  
1043 Brain Barrier in Autoimmune Neuroinflammation. *Cell Rep* [Internet]. 2017 Nov 21  
1044 [cited 2018 Dec 31];21(8):2104–17. Available from:  
1045 <http://www.ncbi.nlm.nih.gov/pubmed/29166603>
- 1046 43. Drew PJ, Shih AY, Driscoll JD, Knutsen PM, Blinder P, Davalos D, et al. Chronic  
1047 optical access through a polished and reinforced thinned skull. *Nat Methods* [Internet].  
1048 2010 Dec [cited 2012 Oct 30];7(12):981–4. Available from:  
1049 [http://www.pubmedcentral.nih.gov/articlerender.fcgi?artid=3204312&tool=pmcentrez&](http://www.pubmedcentral.nih.gov/articlerender.fcgi?artid=3204312&tool=pmcentrez&rendertype=abstract)  
1050 [rendertype=abstract](http://www.pubmedcentral.nih.gov/articlerender.fcgi?artid=3204312&tool=pmcentrez&rendertype=abstract)

- 1051 44. Davalos D, Grutzendler J, Yang G, Kim J V, Zuo Y, Jung S, et al. ATP mediates rapid  
1052 microglial response to local brain injury in vivo. *Nat Neurosci* [Internet].  
1053 2005;8(6):752–8. Available from: <http://www.nature.com/doi/10.1038/nn1472>
- 1054 45. Iuchi T, Shingyoji M, Itakura M, Yokoi S, Moriya Y, Tamura H, et al. Frequency of  
1055 brain metastases in non-small-cell lung cancer, and their association with epidermal  
1056 growth factor receptor mutations. *Int J Clin Oncol* [Internet]. Springer Japan; 2015 Aug  
1057 22 [cited 2017 Oct 27];20(4):674–9. Available from:  
1058 <http://link.springer.com/10.1007/s10147-014-0760-9>
- 1059 46. Kienast Y, von Baumgarten L, Fuhrmann M, Klinkert WEF, Goldbrunner R, Herms J,  
1060 et al. Real-time imaging reveals the single steps of brain metastasis formation. *Nat*  
1061 *Med* [Internet]. Nature Publishing Group; 2010 Jan [cited 2012 Oct 12];16(1):116–22.  
1062 Available from: <http://www.ncbi.nlm.nih.gov/pubmed/20023634>
- 1063 47. Goldfarb Y, Sorski L, Benish M, Levi B, Melamed R, Ben-Eliyahu S. Improving  
1064 postoperative immune status and resistance to cancer metastasis: A combined  
1065 perioperative approach of immunostimulation and prevention of excessive surgical  
1066 stress responses. *Ann Surg* [Internet]. 2011 Apr [cited 2017 Oct 27];253(4):798–810.  
1067 Available from: <http://www.ncbi.nlm.nih.gov/pubmed/21475023>
- 1068 48. Rosenne E, Sorski L, Shaashua L, Neeman E, Matzner P, Levi B, et al. In vivo  
1069 suppression of NK cell cytotoxicity by stress and surgery: glucocorticoids have a  
1070 minor role compared to catecholamines and prostaglandins. *Brain Behav Immun*  
1071 [Internet]. 2014 Mar [cited 2015 May 16];37:207–19. Available from:  
1072 <http://www.sciencedirect.com/science/article/pii/S0889159113005928>
- 1073 49. Liu L, Wu J, Liu J, Dick A. Role of CpG oligodeoxynucleotide in angiogenesis. *Lancet*  
1074 [Internet]. Elsevier; 2016 Feb 25 [cited 2017 Nov 19];387:S65. Available from:  
1075 <http://linkinghub.elsevier.com/retrieve/pii/S0140673616004529>
- 1076 50. Eichler AF, Chung E, Kodack DP, Loeffler JS, Fukumura D, Jain RK. The biology of  
1077 brain metastases—translation to new therapies. *Nat Rev Clin Oncol*. 2012;8(6):344–  
1078 56.
- 1079 51. Klinman DM. Immunotherapeutic uses of CpG oligodeoxynucleotides. *Nat Rev*  
1080 *Immunol* [Internet]. Nature Publishing Group; 2004 Apr 1 [cited 2017 Aug  
1081 20];4(4):249–59. Available from: <http://www.nature.com/doi/10.1038/nri1329>
- 1082 52. Dong Y, Benveniste EN. Immune function of astrocytes. *Glia* [Internet]. John Wiley &  
1083 Sons, Inc.; 2001 Nov 1 [cited 2017 Sep 7];36(2):180–90. Available from:  
1084 <http://doi.wiley.com/10.1002/glia.1107>
- 1085 53. Aloisi F. Immune function of microglia. *Glia* [Internet]. 2001 Nov [cited 2017 Sep  
1086 7];36(2):165–79. Available from: <http://doi.wiley.com/10.1002/glia.1106>
- 1087 54. Suk K, Chang I, Kim YH, Kim S, Kim JY, Kim H, et al. Interferon  $\gamma$  (IFN $\gamma$ ) and tumor  
1088 necrosis factor  $\alpha$  synergism in ME-180 cervical cancer cell apoptosis and necrosis.  
1089 IFN- $\gamma$  inhibits cytoprotective NF- $\kappa$ B through STAT1/IRF-1 pathways. *J Biol Chem*  
1090 [Internet]. American Society for Biochemistry and Molecular Biology; 2001 Apr 20  
1091 [cited 2017 Oct 8];276(16):13153–9. Available from:  
1092 <http://www.ncbi.nlm.nih.gov/pubmed/11278357>
- 1093 55. Lorgier M, Felding-Habermann B. Capturing changes in the brain microenvironment  
1094 during initial steps of breast cancer brain metastasis. *Am J Pathol* [Internet]. American



- 1095 Society for Investigative Pathology; 2010 Jun [cited 2012 Oct 26];176(6):2958–71.  
1096 Available from:  
1097 [http://www.pubmedcentral.nih.gov/articlerender.fcgi?artid=2877856&tool=pmcentrez&](http://www.pubmedcentral.nih.gov/articlerender.fcgi?artid=2877856&tool=pmcentrez&rendertype=abstract)  
1098 [rendertype=abstract](http://www.pubmedcentral.nih.gov/articlerender.fcgi?artid=2877856&tool=pmcentrez&rendertype=abstract)
- 1099 56. Kobayashi K, Imagama S, Ohgomori T, Hirano K, Uchimura K, Sakamoto K, et al.  
1100 Minocycline selectively inhibits M1 polarization of microglia. *Cell Death Dis* [Internet].  
1101 2013 Mar 7 [cited 2017 Mar 5];4(3):e525. Available from:  
1102 <http://www.ncbi.nlm.nih.gov/pubmed/23470532>
- 1103 57. Bennett ML, Bennett FC, Liddel SA, Ajami B, Zamanian JL, Fernhoff NB, et al.  
1104 New tools for studying microglia in the mouse and human CNS. *Proc Natl Acad Sci*  
1105 [Internet]. National Academy of Sciences; 2016 Mar 22 [cited 2017 Mar  
1106 7];113(12):E1738–46. Available from: <http://www.ncbi.nlm.nih.gov/pubmed/26884166>
- 1107 58. Sierra A, Abiega O, Shahraz A, Neumann H. Janus-faced microglia: beneficial and  
1108 detrimental consequences of microglial phagocytosis. *Front Cell Neurosci* [Internet].  
1109 Frontiers Media SA; 2013 [cited 2017 Oct 7];7:6. Available from:  
1110 <http://www.ncbi.nlm.nih.gov/pubmed/23386811>
- 1111 59. Rogers NJ, Lees MJ, Gabriel L, Maniati E, Rose SJ, Potter PK, et al. A Defect in  
1112 Marco Expression Contributes to Systemic Lupus Erythematosus Development via  
1113 Failure to Clear Apoptotic Cells. *J Immunol* [Internet]. 2009 Feb 15 [cited 2017 Oct  
1114 7];182(4):1982–90. Available from:  
1115 <http://www.jimmunol.org/cgi/doi/10.4049/jimmunol.0801320>
- 1116 60. Burke AJ, Sullivan FJ, Giles FJ, Glynn SA. The yin and yang of nitric oxide in cancer  
1117 progression [Internet]. *Carcinogenesis*. Oxford University Press; 2013 [cited 2017 Oct  
1118 8]. p. 503–12. Available from: [https://academic.oup.com/carcin/article-](https://academic.oup.com/carcin/article-lookup/doi/10.1093/carcin/bgt034)  
1119 [lookup/doi/10.1093/carcin/bgt034](https://academic.oup.com/carcin/article-lookup/doi/10.1093/carcin/bgt034)
- 1120 61. Brastianos HC, Cahill DP, Brastianos PK. Systemic therapy of brain metastases. *Curr*  
1121 *Neurol Neurosci Rep* [Internet]. 2015 Feb [cited 2015 Mar 24];15(2):518. Available  
1122 from: <http://www.ncbi.nlm.nih.gov/pubmed/25492479>
- 1123 62. Takeshita S, Takeshita F, Haddad DE, Janabi N, Klinman DM. Activation of microglia  
1124 and astrocytes by CpG oligodeoxynucleotides. *Neuroreport* [Internet]. 2001 Oct 8  
1125 [cited 2017 Oct 15];12(14):3029–32. Available from:  
1126 <http://www.ncbi.nlm.nih.gov/pubmed/11568631>
- 1127 63. Chen, C, Qian, Y. Protective role of dexmedetomidine in unmethylated CpG-induced  
1128 inflammation responses in BV2 microglia cells. *Folia Neuropathol* [Internet]. 2016  
1129 [cited 2018 Jul 22];54(4):382–91. Available from:  
1130 <http://www.ncbi.nlm.nih.gov/pubmed/28139820>
- 1131 64. La Maestra S, Frosina G, Micale RT, D’Oria C, Garibaldi S, Daga A, et al. Brain  
1132 microglia activation induced by intracranial administration of oligonucleotides and its  
1133 pharmacological modulation. *Drug Deliv Transl Res* [Internet]. Springer US; 2018 Jun  
1134 4 [cited 2018 Jul 22];8(5):1345–54. Available from:  
1135 <http://link.springer.com/10.1007/s13346-018-0535-3>
- 1136 65. Aucott H, Lundberg J, Salo H, Klevenvall L, Damberg P, Ottosson L, et al.  
1137 Neuroinflammation in Response to Intracerebral Injections of Different HMGB1 Redox  
1138 Isoforms. *J Innate Immun* [Internet]. Karger Publishers; 2018 [cited 2019 Jan  
1139 2];10(3):215–27. Available from: <http://www.ncbi.nlm.nih.gov/pubmed/29478057>

- 1140 66. Tohme S, Simmons RL, Tsung A. Surgery for cancer: A trigger for metastases.  
1141 Cancer Res [Internet]. 2017 Apr 1 [cited 2018 Mar 3];77(7):1548–52. Available from:  
1142 <http://www.ncbi.nlm.nih.gov/pubmed/28330928>
- 1143 67. Shaashua L, Shabat-Simon M, Haldar R, Matzner P, Zmora O, Shabtai M, et al.  
1144 Perioperative COX-2 and  $\beta$ -adrenergic blockade improves metastatic biomarkers in  
1145 breast cancer patients in a phase-II randomized trial. Clin Cancer Res [Internet]. 2017  
1146 Aug 15 [cited 2017 Oct 27];23(16):4651–61. Available from:  
1147 <http://www.ncbi.nlm.nih.gov/pubmed/28490464>
- 1148 68. Caprotti R, Brivio F, Fumagalli L, Nobili C, Degrade L, Lissoni P, et al. Free-from-  
1149 progression period and overall short preoperative immunotherapy with IL-2 increases  
1150 the survival of pancreatic cancer patients treated with macroscopically radical surgery.  
1151 Anticancer Res [Internet]. 2008 [cited 2017 Nov 13];28(3 B):1951–4. Available from:  
1152 <http://www.ncbi.nlm.nih.gov/pubmed/18630487>
- 1153 69. Brivio F, Fumagalli L, Lissoni P, Nardone A, Nespoli L, Fattori L, et al. Pre-operative  
1154 immunoprophylaxis with interleukin-2 may improve prognosis in radical surgery for  
1155 colorectal cancer stage B-C. Anticancer Res [Internet]. 2006 [cited 2017 Nov 13];26(1  
1156 B):599–603. Available from: <http://www.ncbi.nlm.nih.gov/pubmed/16739327>
- 1157 70. Xiong Z, Gharagozlou S, Vengco I, Chen W, Ohlfest JR. Effective CpG  
1158 immunotherapy of breast carcinoma prevents but fails to eradicate established brain  
1159 metastasis. Clin Cancer Res [Internet]. American Association for Cancer Research;  
1160 2008 [cited 2017 Dec 15];14(17):5484–93. Available from:  
1161 <http://clincancerres.aacrjournals.org/cgi/doi/10.1158/1078-0432.CCR-07-4139>
- 1162 71. Qin M, Li Y, Yang X, Wu H. Safety of Toll-like receptor 9 agonists: A systematic  
1163 review and meta-analysis. Immunopharmacol Immunotoxicol [Internet]. 2014 Aug 21  
1164 [cited 2018 Jun 3];36(4):251–60. Available from:  
1165 <http://www.ncbi.nlm.nih.gov/pubmed/24555494>
- 1166 72. Scheiermann J, Klinman DM. Clinical evaluation of CpG oligonucleotides as adjuvants  
1167 for vaccines targeting infectious diseases and cancer. Vaccine [Internet]. Elsevier;  
1168 2014 Nov 12 [cited 2018 Jun 3];32(48):6377–89. Available from:  
1169 [https://www.sciencedirect.com/science/article/pii/S0264410X14008664?via%3Dihub#](https://www.sciencedirect.com/science/article/pii/S0264410X14008664?via%3Dihub#sec0055)  
1170 [sec0055](https://www.sciencedirect.com/science/article/pii/S0264410X14008664?via%3Dihub#sec0055)
- 1171 73. Hamilton A, Sibson NR. Role of the systemic immune system in brain metastasis. Mol  
1172 Cell Neurosci [Internet]. 2013 Mar [cited 2015 Mar 5];53:42–51. Available from:  
1173 <http://www.sciencedirect.com/science/article/pii/S1044743112001868>
- 1174 74. Joyce JA, Pollard JW. Microenvironmental regulation of metastasis. Nat Rev Cancer  
1175 [Internet]. NIH Public Access; 2009 Apr [cited 2016 Nov 7];9(4):239–52. Available  
1176 from: <http://www.ncbi.nlm.nih.gov/pubmed/19279573>
- 1177 75. Quail DF, Joyce JA. Microenvironmental regulation of tumor progression and  
1178 metastasis. Nat Med [Internet]. 2013 Nov [cited 2014 Jul 10];19(11):1423–37.  
1179 Available from:  
1180 [http://www.pubmedcentral.nih.gov/articlerender.fcgi?artid=3954707&tool=pmcentrez&](http://www.pubmedcentral.nih.gov/articlerender.fcgi?artid=3954707&tool=pmcentrez&rendertype=abstract)  
1181 [rendertype=abstract](http://www.pubmedcentral.nih.gov/articlerender.fcgi?artid=3954707&tool=pmcentrez&rendertype=abstract)
- 1182 76. Sun H, Sun C, Tian Z, Xiao W. NK cells in immunotolerant organs. Cell Mol Immunol  
1183 [Internet]. Nature Publishing Group; 2013 May 8 [cited 2017 Oct 27];10(3):202–12.  
1184 Available from: <http://www.nature.com/doifinder/10.1038/cmi.2013.9>

- 1185 77. Poli A, Kmiecik J, Domingues O, Hentges F, Bléry M, Chekenya M, et al. NK cells in  
1186 central nervous system disorders. *J Immunol* [Internet]. American Association of  
1187 Immunologists; 2013 Jun 1 [cited 2017 Oct 23];190(11):5355–62. Available from:  
1188 <http://www.ncbi.nlm.nih.gov/pubmed/23687193>
- 1189 78. Kopf M, Schneider C, Nobs SP. The development and function of lung-resident  
1190 macrophages and dendritic cells. *Nat Immunol* [Internet]. Nature Research; 2015 Dec  
1191 18 [cited 2017 Oct 14];16(1):36–44. Available from:  
1192 <http://www.nature.com/doifinder/10.1038/ni.3052>
- 1193 79. Schwartz M, Kipnis J, Rivest S, Prat A. How do immune cells support and shape the  
1194 brain in health, disease, and aging? *J Neurosci* [Internet]. Society for Neuroscience;  
1195 2013 Nov 6 [cited 2017 Oct 14];33(45):17587–96. Available from:  
1196 <http://www.ncbi.nlm.nih.gov/pubmed/24198349>
- 1197 80. Abbott NJ, Friedman A. Overview and introduction: the blood-brain barrier in health  
1198 and disease. *Epilepsia* [Internet]. 2012 Nov [cited 2013 Mar 2];53 Suppl 6:1–6.  
1199 Available from: <http://www.ncbi.nlm.nih.gov/pubmed/23134489>
- 1200 81. Zhang RD, Price JE, Fujimaki T, Bucana CD, Fidler IJ. Differential permeability of the  
1201 blood-brain barrier in experimental brain metastases produced by human neoplasms  
1202 implanted into nude mice. *Am J Pathol* [Internet]. American Society for Investigative  
1203 Pathology; 1992 Nov [cited 2017 Oct 14];141(5):1115–24. Available from:  
1204 <http://www.ncbi.nlm.nih.gov/pubmed/1443046>
- 1205 82. Zhang M, Olsson Y. Reactions of astrocytes and microglial cells around  
1206 hematogenous metastases of the human brain expression of endothelin-like  
1207 immunoreactivity in reactive astrocytes and activation of microglial cells. *J Neurol Sci*  
1208 [Internet]. 1995 Dec [cited 2017 Oct 14];134(1–2):26–32. Available from:  
1209 <http://www.ncbi.nlm.nih.gov/pubmed/8747839>
- 1210 83. Pukrop T, Dehghani F, Chuang H-N, Lohaus R, Bayanga K, Heermann S, et al.  
1211 Microglia promote colonization of brain tissue by breast cancer cells in a Wnt-  
1212 dependent way. *Glia* [Internet]. Wiley Subscription Services, Inc., A Wiley Company;  
1213 2010 Jun 14 [cited 2017 Oct 14];58(12):1477–1489. Available from:  
1214 <http://doi.wiley.com/10.1002/glia.21022>
- 1215 84. Andreou KE, Soto MS, Allen D, Economopoulos V, de Bernardi A, Larkin JR, et al.  
1216 Anti-inflammatory microglia/macrophages as a potential therapeutic target in brain  
1217 metastasis. *Front Oncol* [Internet]. Frontiers Media SA; 2017 [cited 2017 Nov  
1218 26];7(7):251. Available from:  
1219 <https://www.ncbi.nlm.nih.gov/pmc/articles/PMC5670100/pdf/fonc-07-00251.pdf>
- 1220 85. Wrobel JK, Toborek M. Blood–brain barrier remodeling during brain metastasis  
1221 formation. *Mol Med* [Internet]. The Feinstein Institute for Medical Research; 2016 Jan  
1222 13 [cited 2017 May 22];22(1):1. Available from:  
1223 <http://www.ncbi.nlm.nih.gov/pubmed/26837070>
- 1224 86. He BP, Wang JJ, Zhang X, Wu Y, Wang M, Bay B-H, et al. Differential reactions of  
1225 microglia to brain metastasis of lung cancer. *Mol Med* [Internet]. The Feinstein  
1226 Institute for Medical Research; 2006 [cited 2017 Apr 14];12(7–8):161–70. Available  
1227 from: <http://www.ncbi.nlm.nih.gov/pubmed/17088948>
- 1228 87. Wu S-Y, Watabe K. The roles of microglia/macrophages in tumor progression of brain  
1229 cancer and metastatic disease. *Front Biosci* [Internet]. 2017 [cited 2018 Dec

- 1230 31];22:1805–29. Available from: <http://www.ncbi.nlm.nih.gov/pubmed/28410147>
- 1231 88. Soto MS, Sibson NR. The Multifarious Role of Microglia in Brain Metastasis. *Front*  
1232 *Cell Neurosci* [Internet]. 2018 [cited 2018 Dec 31];12. Available from:  
1233 [www.frontiersin.org](http://www.frontiersin.org)
- 1234 89. Li W, Graeber MB. The molecular profile of microglia under the influence of glioma.  
1235 *Neuro Oncol* [Internet]. Oxford University Press; 2012 Aug [cited 2017 Oct  
1236 27];14(8):958–78. Available from: <http://www.ncbi.nlm.nih.gov/pubmed/22573310>
- 1237 90. Louie E, Chen XF, Coomes A, Ji K, Tsirka S, Chen EI. Neurotrophin-3 modulates  
1238 breast cancer cells and the microenvironment to promote the growth of breast cancer  
1239 brain metastasis. *Oncogene* [Internet]. NIH Public Access; 2013 Aug 29 [cited 2017  
1240 Oct 28];32(35):4064–77. Available from:  
1241 <http://www.nature.com/doi/10.1038/onc.2012.417>
- 1242 91. Brantley EC, Guo L, Zhang C, Lin Q, Yokoi K, Langley RR, et al. Nitric oxide-  
1243 mediated tumoricidal activity of murine microglial cells. *Transl Oncol* [Internet]. 2010  
1244 Dec 1 [cited 2017 Oct 14];3(6):380–8. Available from:  
1245 <http://www.ncbi.nlm.nih.gov/pubmed/21151477>
- 1246 92. Winkler F. The brain metastatic niche. *J Mol Med* [Internet]. Springer Berlin  
1247 Heidelberg; 2015 Nov 22 [cited 2017 Oct 28];93(11):1213–20. Available from:  
1248 <http://link.springer.com/10.1007/s00109-015-1357-0>
- 1249 93. Hansen RP, Vedsted P, Sokolowski I, Søndergaard J, Olesen F. Time intervals from  
1250 first symptom to treatment of cancer: A cohort study of 2,212 newly diagnosed cancer  
1251 patients. *BMC Health Serv Res* [Internet]. BioMed Central; 2011 Dec 25 [cited 2017  
1252 Oct 28];11(1):284. Available from:  
1253 <http://bmchealthservres.biomedcentral.com/articles/10.1186/1472-6963-11-284>
- 1254



1255 **Figure captions**

1256

1257 **Figure 1: A single systemic prophylactic treatment with CpG-C results in long term**  
1258 **reduction of metastatic burden in the brain**

1259 (a) In the experimental metastasis models, we used the assisted external carotid artery  
1260 inoculation (aECAi) approach (32) for injection of tumor cells (see *Methods*); a method that  
1261 improves brain targeting and preserves cerebral hemodynamics. (b) Histological images of  
1262 D122 brain metastases from C57BL/6J mice on day 21 post tumor inoculation show well-  
1263 demarcated metastases, as well as vessel co-option growth. PC14-PE6 brain metastases  
1264 from nude animals on day 25 post tumor inoculation show large well-demarcated  
1265 metastases. Scale bar is 500 $\mu$ m for the images on the left and middle, and 50 $\mu$ m for the  
1266 images on the right. (c-f) A single prophylactic systemic (i.p.) injection of 4mg/kg CpG-C  
1267 resulted in reduced growth of experimental brain metastases, as indicated by  
1268 bioluminescence and fluorescence imaging. (c) C57BL/J6 mice injected with syngeneic  
1269 D122 tumor cells, and pre-treated with CpG-C, had reduced tumor burden compared to  
1270 control animals, becoming significant on day 14 (ci; n=6-7;  $F_{(1,11)}=19.02$ ,  $p=0.0011$ ), and  
1271 reaching a 77-fold difference in total flux on day 21 (two-tailed Mann-Whitney  $U=3$ ,  
1272  $p=0.0082$ ; cii). Interestingly, in two CpG-C-treated animals bioluminescent signal gradually  
1273 decreased and disappeared on day 21. (d) *Ex-vivo* bioluminescence imaging of the brains  
1274 from the syngeneic model indicated a 48-fold reduced tumor burden (total flux) in CpG-C  
1275 treated animals (n=6; two-tailed unpaired student t-test,  $t(10)=3.722$ ,  $p=0.0040$ ). (e) Athymic  
1276 nude mice injected with human (xenograft) PC14-PE6 tumor cells, and pre-treated with  
1277 CpG-C, had reduced tumor burden compared to control animals, becoming significant on  
1278 day 4 (e.i; n=7;  $F_{(1,12)}=77.45$ ,  $p<0.0001$ ), and reaching a 82-fold difference in total flux on day  
1279 25 (two-tailed unpaired student t-test,  $t(12)=7.09$ ,  $p<0.0001$ ; e.ii). (f) Using Maestro  
1280 fluorescence imaging, a reduction in brain tumor burden (i.e. tumor area) was evident in the  
1281 human xenograft model in CpG-C-treated animals (n=7; two-tailed Mann-Whitney  $U=8$ ,  
1282  $p=0.0373$ ). (g) (left) timeline for spontaneous melanoma brain metastasis model (33) (see  
1283 *Methods*). (right) CpG-C treatment during seven perioperative days resulted in reduced  
1284 micrometastases in the brain (measured by mCherry mRNA expression; n=9 and n=12 for  
1285 control and CpG-C, respectively; two-tailed unpaired student t-test,  $t(19)=2.278$ ,  $p=0.0345$ ).  
1286 Background of images was manually removed. Boxplot whiskers represent min-max range.

1287

1288

1289 **Figure 2: The effects of CpG-C on brain metastases are not mediated by NK cells or**  
1290 **monocytes**

1291 (a) Depletion of NK cells using NK1.1 antibody, resulted in a 5-fold elevation in D122 Lewis  
1292 lung carcinoma tumor retention in the lungs ( $n=8$ ;  $t(14)=4.4781$ ,  $p=0.0001$ ), and partially  
1293 blocked the beneficial effects of CpG-C ( $n=8$ ;  $t(14)=1.1517$ ,  $p=0.0038$ ), evident in naïve  
1294 animals ( $n=8$ ;  $t(14)=0.7002$ ,  $p=0.0019$ ). (b) In brains of the same animals, NK depletion had  
1295 no effect on tumor retention ( $n=8$ ;  $t(14)=0.1894$ ,  $p=0.3935$ ), nor mediated the beneficial  
1296 effects of CpG-C ( $n=8$ ;  $t(14)=0.1099$ ,  $p=0.0811$ ), evident in both naïve ( $n=8$ ;  $t(14)=0.7973$ ,  
1297  $p<0.0001$ ) and NK depleted animals ( $n=8$ ;  $t(14)=0.4979$ ,  $p=0.0056$ ). (c) Depletion of  
1298 monocytes using clodronate liposomes resulted in increased lung tumor retention of D122  
1299 Lewis lung carcinoma cells ( $n=7-8$ ;  $t(13)=0.9072$ ,  $p=0.0292$ ), an effect rescued by CpG-C  
1300 ( $n=8-9$ ;  $t(15)=1.270$ ,  $p=0.0003$ ), indicating lung tumor retention is mediated by monocytes,  
1301 while they do not mediate the effects of CpG-C. (d) In brains of the same animals, monocyte  
1302 depletion did not affect tumor retention ( $n=7-8$ ;  $t(13)=0.3028$ ,  $p=0.3081$ ), and CpG-C  
1303 reduced tumor retention in naïve ( $n=7$ ;  $t(12)=0.7910$ ,  $p=0.0006$ ), and in monocyte-depleted  
1304 animals ( $n=8-10$ ;  $t(16)=1.0377$ ,  $p=0.0001$ ). Two-way permutations were used for the above  
1305 analyses. Boxplot whiskers represent min-max range.

1306

1307

1308

1309 **Figure 3: CpG-C infiltrates the brain and is internalized by endothelial cells,**  
1310 **astrocytes, and microglia**

1311 (a-b) TAMRA-labeled CpG-C was injected intraperitoneally, 24 hours later brains were  
1312 perfused, and CpG-C internalization in endothelial cells (CD31), astrocytes (GFAP and  
1313 GLAST), and microglia (CX3CR1 and CD11b) was visualized in histological sections using  
1314 confocal microscopy (a; top panels are 15 $\mu$ m z-max projections, and lower panels are partial  
1315 reconstruction); and quantified using ImageStream FACS analysis (b). The majority of each  
1316 of the three cell populations internalized CpG-C, indicating that CpG-C crosses the BBB into  
1317 the parenchyma (n=4). Scale bar is 5 $\mu$ m. Data presented as mean ( $\pm$ SEM).

1318

1319 **Figure 4: CpG-C does not affect BBB leakage or cellular permeability**

1320 (a-c) Biocytin-TMR was intravenously injected to animals expressing GFP under the  
1321 Claudin-5 promotor 24 hours following CpG-C or control treatment, and ninety minutes later  
1322 brains were perfused and removed. Biocytin-TMR intensity (normalized to intensity levels in  
1323 the liver, not shown) and IgG staining intensity were similar in CpG-C-treated and control  
1324 animals (two-tailed unpaired student t-test,  $t(22)=0.3758$ ,  $p=0.7106$ ; a-b). Moreover, no  
1325 difference in number of gaps in claudin-5 strands was found between control and CpG-C-  
1326 treated animals (two-tailed unpaired student t-test,  $t(22)=0.4283$ ,  $p=0.6726$ ; c). (d) Brain  
1327 sections of WT animals treated with CpG-C or PBS were stained for CD4 or CD68 twenty-  
1328 four hours following treatment. No infiltration of immune cells was detected (spinal cords of  
1329 EAE mice served as positive controls; right panels). (e-f) Using two-photon imaging we  
1330 followed leakage of a low (NaF; 376Da) and a high (Texas-Red; 70kDa) molecular weight  
1331 dextrans. Intensities of representative images (e) were auto-adjusted in Fiji for display  
1332 purposes only. No differences were found between control and CpG-C treated animals at  
1333 baseline ( $p=0.8567$  and  $p=0.8421$  for NaF and Texas-Red respectively), following a single  
1334 CpG-C treatment ( $p=0.9243$  and  $p=0.2419$  for NaF and Texas-Red respectively), and  
1335 following two CpG-C treatments ( $p=0.4656$  and  $p=0.3918$  for NaF and Texas-Red  
1336 respectively. See methods for an explanation of the quantification; f). For (a-c), each sample  
1337 consisted of an average of at least five images that were analyzed. Samples were taken  
1338 from four different anatomical brain regions (cortex, midbrain, cerebellum, and  
1339 hippocampus) in three mice/group (See Supplementary Fig. 4 for regional presentations).  
1340 Scale bar is 50 $\mu$ m. Boxplot whiskers represent min-max range (a-c) and data in (f) is  
1341 presented as mean ( $\pm$ SEM).

1342

1343

1344 **Figure 5: Microglia, but not astrocytes, mediate the effects of CpG-C *in vitro***

1345 (a-d) Primary cultures of microglia and of astrocytes were subjected to 100nM/L CpG-C or  
1346 non-CpG ODN (control) for 24 hours. <sup>125</sup>IUDR-labeled D122 cells were plated with the  
1347 treated primary cultures, or subjected to their conditioned-media alone, and cytotoxicity  
1348 (percent of D122 lysis) was assessed by measuring radioactivity in the media 8 hours later.  
1349 Primary cultured astrocytes, subjected to CpG-C or non-CpG ODN, did not cause tumor cell  
1350 lysis when in contact ( $F_{(3,12)}=0.7755$ ,  $p=0.5298$ ; **a**), nor did their conditioned-media  
1351 ( $F_{(3,9)}=0.6923$ ,  $p=0.5794$ ; **b**). In contrast, primary cultured microglia cells induced lysis in  
1352 tumor cells, and treatment with CpG-C significantly increased it when in contact with tumor  
1353 cells ( $F_{(3,28)}=64.1$ ,  $p<0.0001$ ; **c**), while their conditioned-media had no effect ( $F_{(3,9)}=0.6923$ ,  
1354  $p=0.5794$ ; **d**). (e-i) The microglia cell line, N9, was subjected to CpG-C (see above). Luc2-  
1355 mCherry-labeled D122 cells were plated with the N9 cultures with contact (e) or without  
1356 contact (co-culture; f), or with their conditioned-media alone (g), and bioluminescent signal  
1357 was measured, indicating viability of tumor cells. There was a reduced signal in tumor cells  
1358 cultures that were in direct contact with N9 cells ( $F_{(3,12)}=14.6$ ,  $p=0.0003$ ; **e**), while no  
1359 difference was evident in co-cultures (no contact;  $F_{(3,18)}=0.3535$ ,  $p=0.7872$ ; **f**), or in cultures  
1360 subjected to conditioned-media ( $F_{(3,12)}=0.1425$ ,  $p=0.9325$ ; **g**). Two-tailed one-way ANOVA  
1361 with Bonferroni's multiple comparison correction was used for **a-g**. (h) Annexin V binding (a  
1362 marker for early stage apoptosis) was quantified in D122 cells cultured with pretreated N9  
1363 cells using FACS. Tumor cells cultured with N9 cells pretreated with CpG-C exhibited  
1364 increased annexin V staining (compared to scrambled CpG-C; two-tailed student's t-test for  
1365 unpaired samples,  $t(9)=2.306$ ,  $p=0.0465$ ). (i) N9 cultures treated with CpG-C or non-CpG  
1366 ODN (control) for 24 hours were washed and plated with pH-sensitive bio-particles to assess  
1367 phagocytosis capacity. CpG-C treated N9 cells exhibited a 3-fold increased phagocytic  
1368 capacity (two-tailed student's t-test for unpaired samples,  $t(14)=6.696$ ,  $p<0.0001$ ). Boxplot  
1369 whiskers represent min-max range. Refer to supplementary figure 6b for comparison  
1370 between PBS, non-CpG ODN, and CpG-C.

1371

1372

1373 **Figure 6: Microglia mediate the *in vivo* effects of CpG-C**

1374 (a-e) Chronic *in vivo* two-photon imaging in CX3CR1<sup>GFP/+</sup> mice indicated microglia cells  
1375 (green) have dynamic relations with tdTomato-labeled D122 tumor cells (red; 15µm stacks,  
1376 with 1µm z-steps) and that CpG-C treatment increases tumor internalization by microglia. (a)  
1377 A microglia cell (arrow) interacting with a tumor cell (arrow head; two hours post tumor cells  
1378 inoculation), phagocytizing it (one day later), and dismantling it (day 2 post tumor cell  
1379 injection, inset shows an engulfed tdTomato-positive cell or part of it). (b) Different levels of  
1380 interaction between microglia and tumor cells - (i) no interaction; (ii) contact; and (iii)  
1381 microglia phagocytized a tumor cell. (c) Partial reconstitution of a 15 µm stack with 1µm z-  
1382 steps demonstrating the microglia-tumor cells' "battle field" four hours after tumor cell  
1383 injection. (d) Representative images and quantification (e) of microglia-tumor interactions in  
1384 control and CpG-C treated mice four hours and one day following tumor cell inoculation  
1385 (arrows for contact and arrow heads for internalization). CpG-C treatment resulted in  
1386 increased contacts four hours following tumor inoculation (n=3;  $F_{(1,4)}=2.875$ , p=0.0218) and  
1387 in microglia internalization of tumor cells/debris four (p=0.0372) and twenty-four hours (n=3;  
1388  $F_{(1,4)}=3.400$ , p=0.0041) following tumor inoculation. Scale bar for (a-d) is 20µm. (f-h)  
1389 CX3CR1<sup>GFP/+</sup> mice were treated with a single systemic prophylactic CpG-C treatment,  
1390 injected mCherry labeled D122 tumor cells using the aECAi approach, and brains were  
1391 analyzed using ImageStream FACS. While CpG-C treatment did not affect the number of  
1392 microglia cells (n=5; two-tailed Mann-Whitney U=10, p=0.6905; f), or capacity of tumor cell  
1393 infiltration (indicated by total mCherry area in perfused brains; two-tailed Mann-Whitney U=9,  
1394 p=0.5476; g), it resulted in increased phagocytosis of tumor cells by microglia (two-tailed  
1395 student's t-test for unpaired samples, t(4)=3.885, p=0.0178; h). Scale bar for (e-g) is 5µm.  
1396 Data in (e) is presented as mean (±SEM) and boxplot whiskers represent min-max range (f-  
1397 h).

1398  
1399

1400 **Figure 7: Blocking microglia activation or complete depletion hinders the effects of**  
1401 **CpG-C on brain metastasis**

1402 (a-b) Microglia activation was blocked *in vivo* using systemic treatment with minocycline. (a)  
1403 Minocycline treatment resulted in increased brain tumor retention of D122 cells (n=15-16,  
1404 t(27)=66.3229, p=0.0118), while CpG-C treatment reduced tumor retention in naïve mice  
1405 (n=16 for control and n=14 for minocycline treated mice; t(28)=63.0149, p<0.0001), but not  
1406 in minocycline-treated animals (n=14-15; t(27)=42.7850, p=0.1863). The effects of CpG-C  
1407 were completely blocked by minocycline treatment (n=14; t(26)=86.5528, p<0.0001),  
1408 indicating that microglia activation mediates the beneficial effects of CpG-C. (b)  
1409 ImageStream FACS analysis indicated that minocycline blocked (p=0.0493) the beneficial

1410 effects of prophylactic CpG-C treatment ( $p=0.01$ ) on the ability of microglia to phagocytize  
1411 tumor cells ( $n=2$  for control and  $n=3$  for CpG-C and CpG-C+minocycline animals; two-tailed  
1412 one-way ANOVA with Tukey's multiple comparisons test;  $F_{(2,5)}=12.85$ ,  $p=0.0107$ ). (c) Without  
1413 stimulation with CpG-C, microglia cells do not affect brain tumor seeding, as indicated by  
1414 depletion of microglia cells using the colony-stimulating factor 1 receptor inhibitor, PLX5622.  
1415 Microglia depletion did not affect D122 tumor retention in the brain ( $n=14-15$ ;  $t(27)=0.0851$ ,  
1416  $p=0.7490$ ), while it blocked the beneficial effects of CpG-C ( $n=14$  for depleted animals and  
1417  $n=16$  for depleted animals treated with CpG-C;  $t(28)=0.0460$ ,  $p=0.8637$ ), evident in naïve  
1418 animals ( $n=14-15$ ;  $t(27)=0.0460$ ,  $p=0.0087$ ). Accordingly, microglia-depleted animals treated  
1419 with CpG-C had increased brain tumor retention compared to naïve animals treated with  
1420 CpG-C ( $t(28)=0.5417$ ,  $p=0.0068$ ). Two-way permutations were used for analyses of (a) and  
1421 (c). Boxplot whiskers represent min-max range (a,c) and data in (b) is presented as mean  
1422 ( $\pm$ SEM).

1423

1424

1425 **Figure 8: CpG-C treatment results in elevated *in vivo* expression of apoptosis-**  
1426 **inducing, phagocytosis-related, and inflammatory factors.**

1427 (a) CX3CR1<sup>GFP/+</sup> mice were injected with CpG-C or vehicle, and 24 hours later mRNA  
1428 expression levels in sorted microglia cells were quantified using qRT-PCR. In one  
1429 experiment six animals of each group were pooled into a single sample, and in the second  
1430 experiment, two CpG-C treated animals, and three controls, were analyzed separately ( $n=3-$   
1431  $4$  from  $8-9$  animals). As expected, *Tmem119*, a general microglia marker was unaffected by  
1432 the treatment ( $t(5)=0.371$ ,  $p=0.7258$ ). (b) The death ligands, *Tnfsf10* and *Fasl*, were  
1433 elevated by 3-4-fold by a single CpG-C injection ( $t(5)=2.564$ ,  $p=0.0437$ ; and  $t(5)=2.36$ ,  
1434  $p=0.0324$ , respectively). (c) Expression levels of receptors related to phagocytosis were  
1435 significantly higher in microglia of CpG-C-treated animals. While no change was apparent in  
1436 *Cd36* ( $t(5)=0.3966$ ,  $p=0.7080$ ) and *Cd68* ( $t(5)=0.01655$ ,  $p=0.9874$ ), a significant increase  
1437 was evident in *Cd47* ( $t(5)=2.819$ ,  $p=0.0186$ ), *Trem2* ( $t(5)=2.762$ ,  $p=0.0199$ ), and *Marco*  
1438 (which was not detected in control animals) ( $t(4)=4.499$ ,  $p=0.0108$ ). (d) While RNA of the  
1439 inflammatory cytokines *Il-6* and *Il1- $\beta$*  was not affected by CpG-C treatment ( $t(5)=0.04089$ ,  
1440  $p=0.9690$ ;  $t(5)=0.4417$ ,  $p=0.6772$ , respectively), *Tnf* ( $t(4)=3.207$ ,  $p=0.0163$ ) and *Inf- $\gamma$*   
1441 ( $t(4)=2.394$ ,  $p=0.0374$ ), which synergistically induce apoptosis in tumor cells (54), and *Nos2*  
1442 ( $t(5)=2.744$ ,  $p=0.0203$ ), which is tumoricidal at high concentrations (60), were increased  
1443 following CpG-C injection. Data is presented as mean ( $\pm$ SEM).

1444

1445



1446 **Figure 9: Proposed mechanism.** Systemic prophylactic treatment with CpG-C during the  
1447 perioperative period activates microglia to induce apoptosis in tumor cells and phagocytize  
1448 them, resulting in reduced brain metastases colonization. A few weeks to months may pass  
1449 from the time of cancer diagnosis to the time of primary tumor excision (93). During this  
1450 period, and a few weeks after surgical excision (known as the perioperative period), there is  
1451 a high risk for developing brain metastasis with terminal consequences (1). CpG-C, a TLR9  
1452 agonist, given as a systemic prophylactic treatment during this crucial period, infiltrates the  
1453 brain and activates microglia (1), increasing their expression of *Tnfsf10* and *FasL*, resulting in  
1454 contact-dependent induced-apoptosis of tumor cells (2). Furthermore, *Cd47*, *Trem2*, and  
1455 *Marco* expression is increased, triggering enhanced microglial phagocytosis and dismantling  
1456 of tumor cells (3), thereby reducing brain metastasis colonization.

1457

1458 **Supplementary figure 1:**

1459 **Perioperative CpG-C treatment did not affect primary melanoma tumor growth or**  
1460 **spontaneous lung metastasis**

1461 (a) Representative images of melanoma Ret-mCherry primary tumor mass (left panels) and  
1462 sections (right panels) from control and CpG-C treated animals. No differences in tumor  
1463 appearance were evident. (b-c) CpG-C treatments (arrows) did not affect primary tumor  
1464 growth dynamics ( $F_{(2,60)}=0.5041$ ,  $p=0.6066$ ; for  $Y=Y_0 \exp(k \cdot X)$  the 95% confidence intervals  
1465 are:  $Y_0=471.8$  to  $585.3$ ,  $k=0.2890$  to  $0.4971$ , and  $Y_0=509.0$  to  $571.1$ ,  $k=0.3037$  to  $0.4089$  for  
1466 control and CpG-C, respectively; b). Tumors were excised from control and CpG-C treated  
1467 animals at the same size ( $n=9$  and  $n=12$  for control and CpG-C, respectively; two-tailed  
1468 Mann-Whitney  $U=52.50$ ,  $p=0.9260$ ; c). (d) CpG-C treatment during seven perioperative days  
1469 did not affect micrometastases in the lung (measured by mCherry mRNA expression;  $n=9$   
1470 and  $n=12$  for control and CpG-C, respectively; two-tailed unpaired student t-test,  
1471  $t(19)=0.2756$ ,  $p=0.7858$ ). Data in (b) is presented as mean ( $\pm$ SEM) and boxplot whiskers  
1472 represent min-max range (c-d).



1473 **Supplementary figure 2:**

1474 **CpG-C is effective in reducing brain tumor retention in both sexes, across ages, in a**  
1475 **dose-dependent manner, and both as an acute and as a chronic prophylactic**  
1476 **treatment**

1477 (a) A systemic prophylactic injection CpG-C reduced brain tumor retention of D122 cells in  
1478 both male (n=5, two-tailed Mann-Whitney U=0, p=0.0079) and female (n=5-6, two-tailed  
1479 Mann-Whitney U=1, p=0.0087) mice to a similar degree. (b) CpG-C reduced brain tumor  
1480 retention across ages – 6 weeks (n=10, two-tailed Mann-Whitney U=7, p=0.0005); 24 weeks  
1481 (n=10, two-tailed Mann-Whitney U=8, p=0.0007); and 52 weeks (n=10, two-tailed Mann-  
1482 Whitney U=2, p<0.0001). (c) CpG-C reduced brain tumor retention in a dose dependent  
1483 manner (n=10-11, Kruskal-Wallis H=15.98, p=0.0011) reaching significance at 1.2mg/kg  
1484 (p=0.0455), and with higher efficacy at 4mg/kg (p=0.0003). (d) An acute systemic injection of  
1485 CpG-C one day before tumor cell injection (p=0.0298) was effective as chronic injections  
1486 (every other day, starting ten days before tumor inoculation; p=0.0013) in reducing brain  
1487 tumor retention (n=6, Kruskal-Wallis H=12.33, p=0.0001). (e) No weight loss was evident in  
1488 animals receiving either acute or chronic systemic CpG-C treatment (n=6, two-tailed two-  
1489 way ANOVA;  $F_{(2,17)}=1.463$ , p=0.2593). Boxplot whiskers represent min-max range (a-d) and  
1490 data in (e) is presented as mean ( $\pm$ SEM).

1491

1492

1493 **Supplementary figure 3:**

1494 **NK and monocyte depletion**

1495 (a) anti-NK1.1 injection resulted in >90% depletion of NK cells from the blood compared to  
1496 IgG control. (b) Clodronate liposomes resulted in >85% depletion of monocytes from the  
1497 blood (top panels), without affecting microglia viability (lower panels).

1498

1499 **Supplementary figure 4:**

1500 **CpG-C does not affect BBB integrity**

1501 Mice (n=3) were treated with a single systemic (i.p.) injection of CpG-C (4mg/kg), and 24  
1502 hours later biocytin-TMR and IgG infiltration and claudin-5 continuity were measured in the  
1503 cortex, cerebellum, midbrain, and hippocampus (five images for each anatomical region; see  
1504 methods). (a) A tiled sagittal section of a CpG-C treated mouse. (b-d) CpG-C treatment did  
1505 not affect blood vessels leakiness ( $F_{(1,20)}=0.0828$ ,  $p=0.7765$  and  $F_{(1,20)}=1.738$ ,  $p=0.2023$  for  
1506 biocytin-TMR and IgG, respectively; b-c); nor claudin-5 continuity ( $F_{(1,11)}=0.1272$ ,  $p=0.7281$ ;  
1507 d) in any of the analyzed brain regions. Scale bar is 50 $\mu$ m. Data is presented as mean  
1508 ( $\pm$ SEM).

1509

1510 **Supplementary figure 5:**

1511 **CpG-C is taken up into microglia lysosomes *in vitro* and *in vivo***

1512 (a) TAMRA-labeled CpG-C injected systemically is taken up by microglia *in vivo* in  
1513 CX3CR1<sup>GFP/+</sup> mice (top left – before CpG-C injection; bottom left – after CpG-C injection;  
1514 right panel – partial reconstruction; 15 $\mu$ m stacks, with 1 $\mu$ m z-steps). (b) N9 cells pretreated  
1515 with TAMRA-labeled CpG-C for 24 hours (top panels) and microglia cells extracted from  
1516 CX3CR1<sup>GFP/+</sup> mice that were injected with TAMRA-labeled CpG-C 24 hours earlier (bottom  
1517 panels) were co-stained with LysoTracker, demonstrating CpG-C was taken up into the  
1518 lysosomes.

1519

1520 **Supplementary figure 6:**

1521 **PBS and non-CpG ODN affect tumor cells viability similarly**

1522 (a) No differences in brain tumor retention were evident between PBS and non-CpG ODN  
1523 treated animals ( $p=0.9974$ ), while CpG-C significantly reduced brain tumor retention of D122  
1524 cells ( $F_{(2,28)}=8.277$ ,  $p=0.0040$  and  $p=0.0048$  compared to PBS and non-CpG ODN,  
1525 respectively). (b) D122 cells were co-cultured in contact with N9 cells treated with PBS, non-  
1526 CpG ODN, or CpG-C. No differences in tumor cells viability were evident between PBS and  
1527 non-CpG ODN treated cultures ( $p=0.7745$  and  $p=0.1420$  for  $16 \times 10^3$  and  $32 \times 10^3$  D122  
1528 cells/well), while CpG-C significantly reduced tumor cells viability (for  $16 \times 10^3$ :  $F_{(2,20)}=9.767$ ,  
1529  $p=0.0017$  and  $p=0.0062$  compared to PBS and non-CpG ODN, respectively, and for  $32 \times 10^3$ :

1530  $F_{(2,19)}=12.15$ ,  $p=0.0003$  and  $p=0.0477$  compared to PBS and non-CpG ODN, respectively).  
1531 Boxplot whiskers represent min-max range.

1532

### 1533 **Supplementary figure 7:**

#### 1534 **CpG-C does not affect microglia reaction to non-tumor related insults**

1535 (a) Microglial N9 cultures treated with 100nM/L CpG-C for 24 hours reacted similarly in the  
1536 scratch migration assay compared to cultures treated with non-CpG ODN, indicated by  
1537 wound confluence ( $F_{(1,16)}=0.1845$ ,  $p=0.6732$ ) and wound width ( $F_{(1,16)}=0.2801$ ,  $p=0.6039$ ).  
1538 Scale bars is 300 $\mu$ m. (b) Microglia reacted similarly to a photodamage induced *in vivo* by a  
1539 high-power laser (780 nm; 150mW at the sample;  $\sim 1\mu$ m size) in CpG-C treated and control  
1540 CX3CR1<sup>GFP/+</sup> mice ( $F_{(1,8)}=0.1111$ ,  $p=0.7474$ ). Scale bars is 50 $\mu$ m. Data is presented as  
1541 mean ( $\pm$ SEM).

1542

### 1543 **Supplementary figure 8:**

#### 1544 **FACS analyses gating strategies**

1545 (a) Annexin V *in vitro* experiments (Fig. 4h) were analyzed by selecting single cells from a  
1546 plot of SSC against FSC. (b-d) The gates for mCherry positive cells (D122; b) and annexin  
1547 V positive cells (c) were selected based on samples negative for these staining and  
1548 validated using positive control samples containing N9 and mCherry-labeled D122 cells (d).  
1549 To induce annexin V staining (indicating apoptosis) in positive control samples, half of the  
1550 cells were placed in 90 degrees Celsius for 2 min and then immediately on ice for 2 minutes  
1551 and mixed together. (e) Examples for CpG non-ODN (control; left panel) and CpG-C treated  
1552 wells (right panel). (f) ImageStream image data files were analyzed by selecting single cells  
1553 from a plot of object area against object aspect ratio (width/length; left panel) and then  
1554 focused cells using the Gradient RMS feature (right panel). (g) For CpG-C-uptake  
1555 experiments (Fig. 3c), cells that have taken up FITC-labeled CpG-C were identified on a  
1556 scatter plot of FITC against the appropriate fluorophore (e.g. APC for microglia cells). (h) For  
1557 experiments in (Fig. 5e-g,i) mCherry positive cells (left panel) and microglia cells (from  
1558 CX3CR1<sup>GFP/+</sup> mice; middle panel) were identified on a scatter plot of intensity of the relevant  
1559 fluorophore against object aspect ratio. mCherry positive microglia cells were identified  
1560 inside the microglia sub-population in a histogram of the of mCherry intensity (right panel).  
1561 For quantification of (g) and (h; right panel) we used the internalization wizard.

1562

1563

1564 **Supplementary movie:**

1565 Microglia (white) treated with CpG-C phagocytize invading tumor cells (red) *in vivo* as early  
1566 as few hours after tumor cell inoculation. Orange arrows mark phagocytosis events at day 0  
1567 (left) and their corresponding events at day 1 (right). Field of view for each day is 200 $\mu$ m.

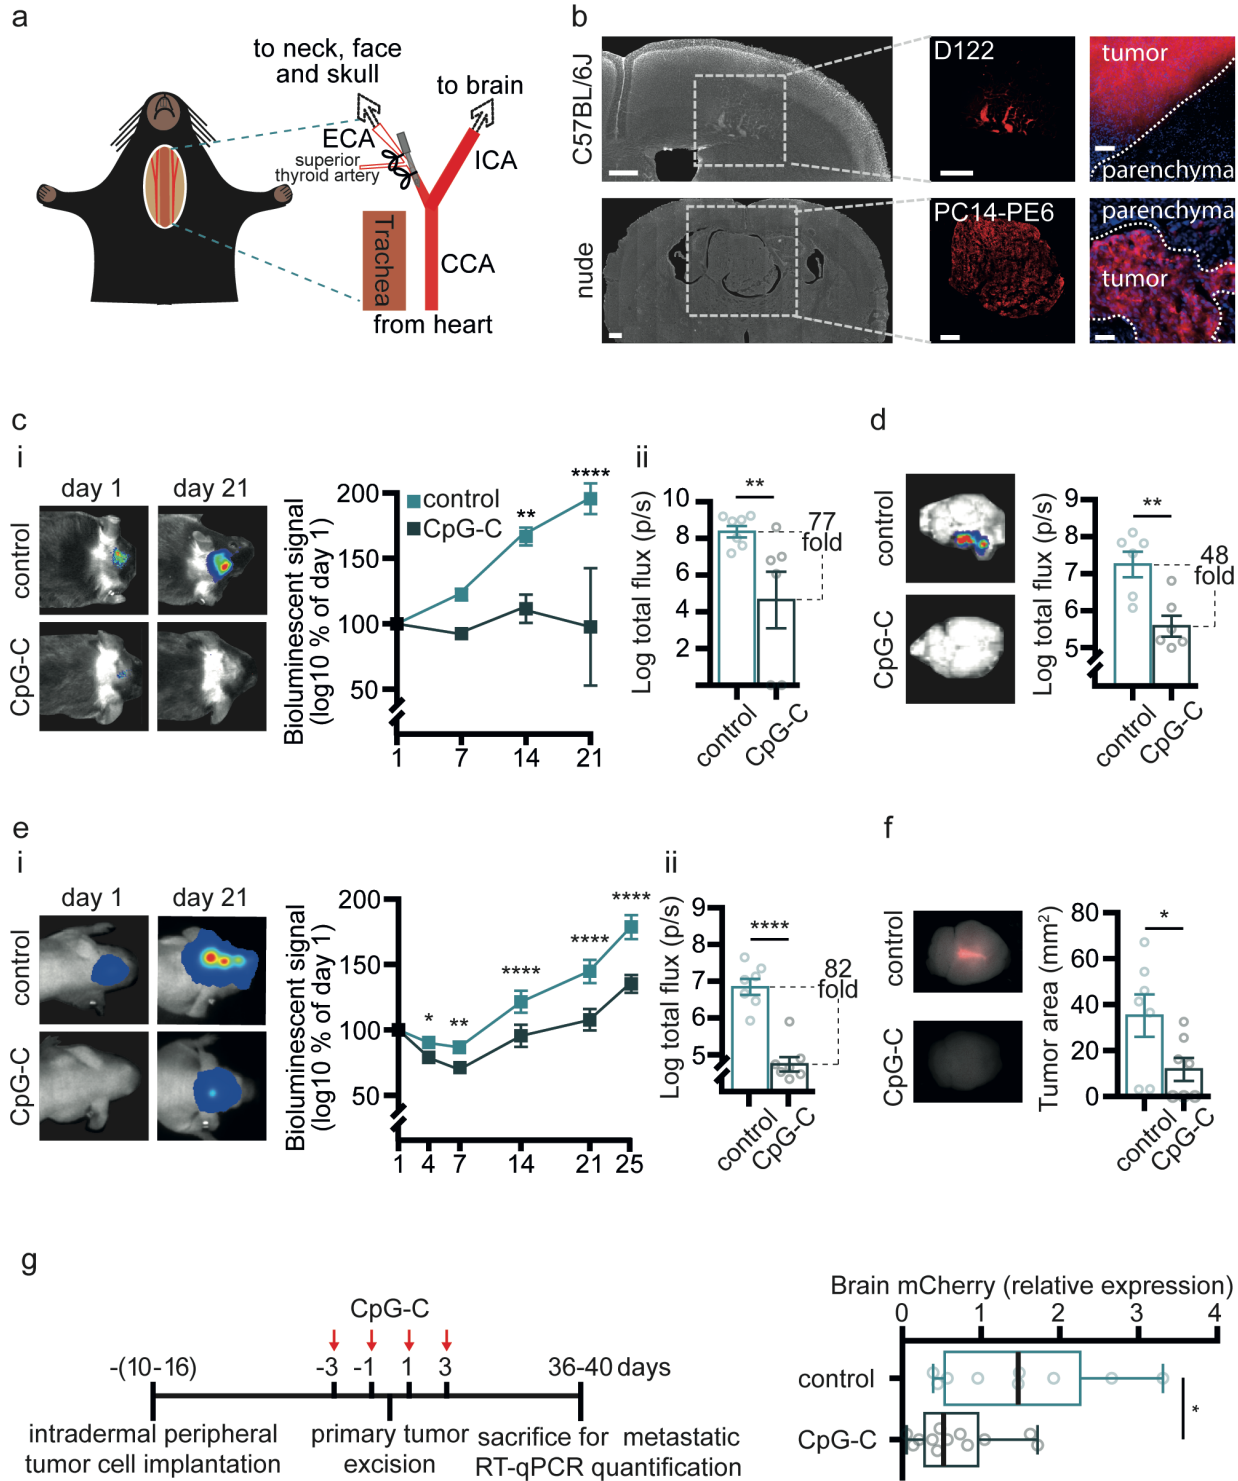

Figure 1 - Benbenishty et al.

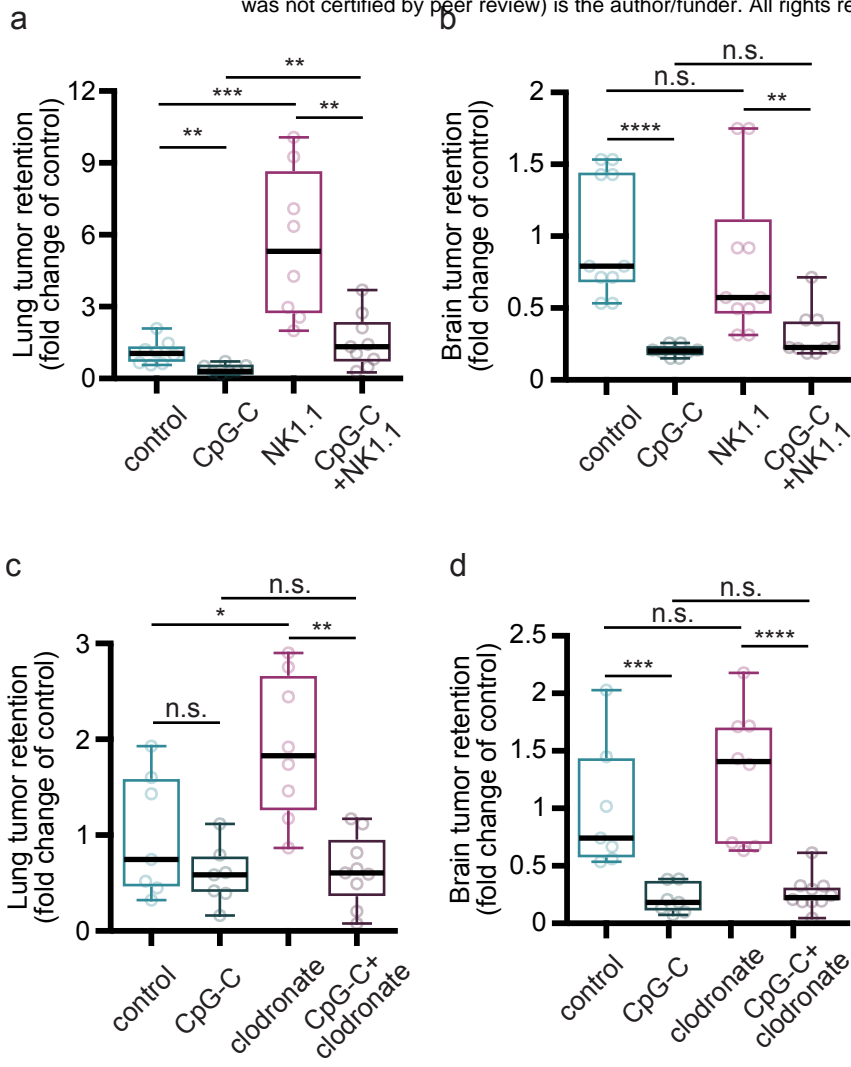



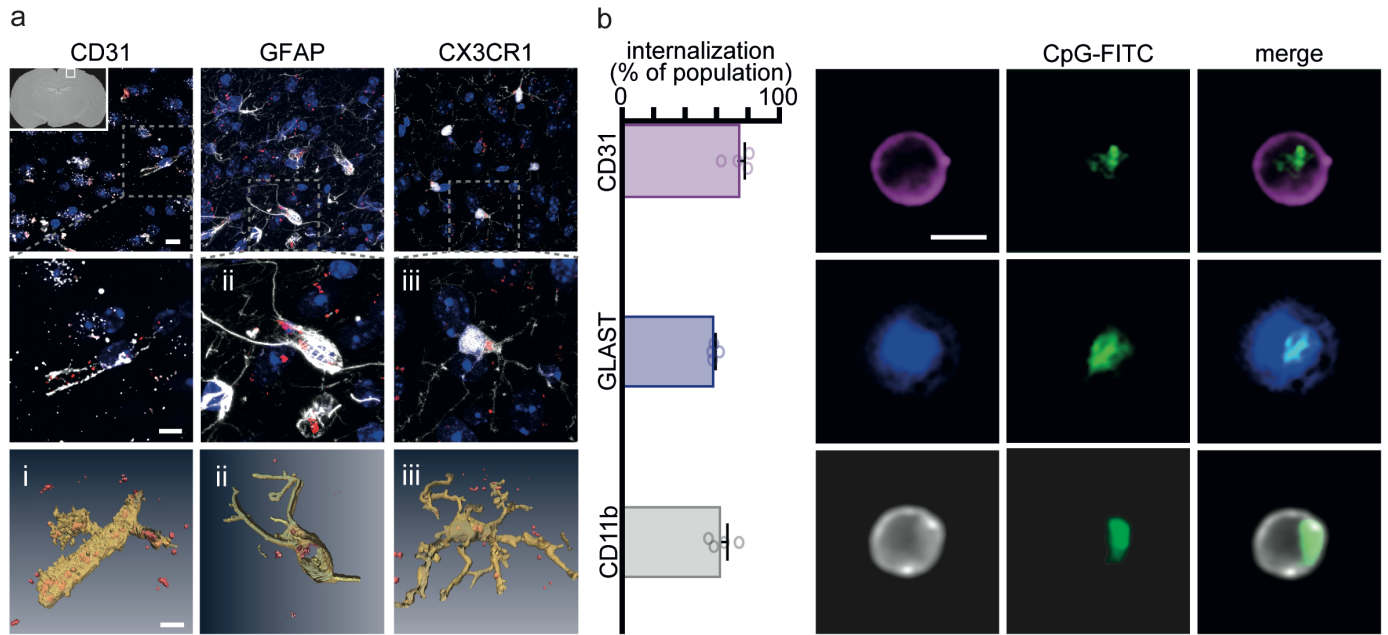

Figure 3 - Benbenishty et al.

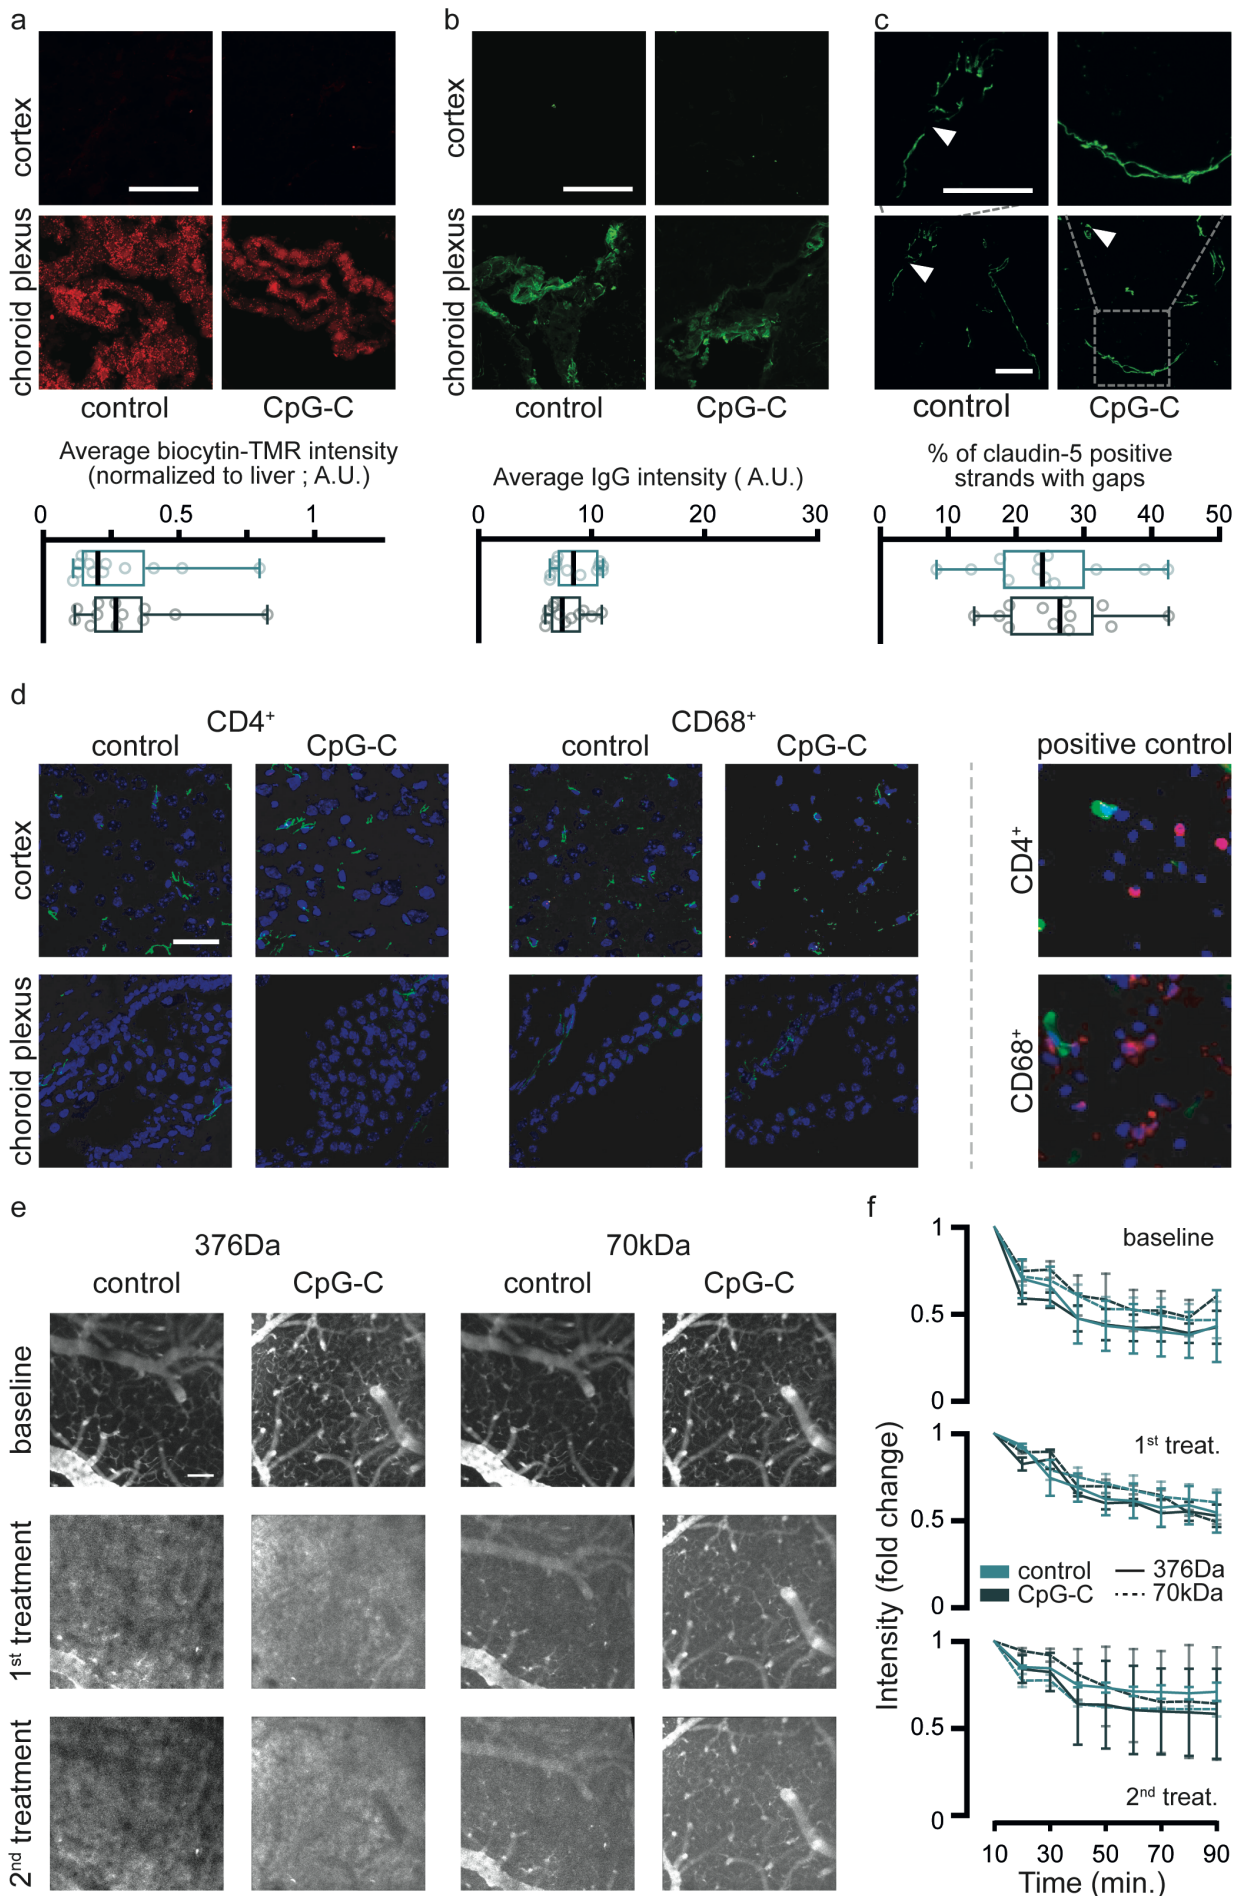

Figure 4 - Benbenishty et al.

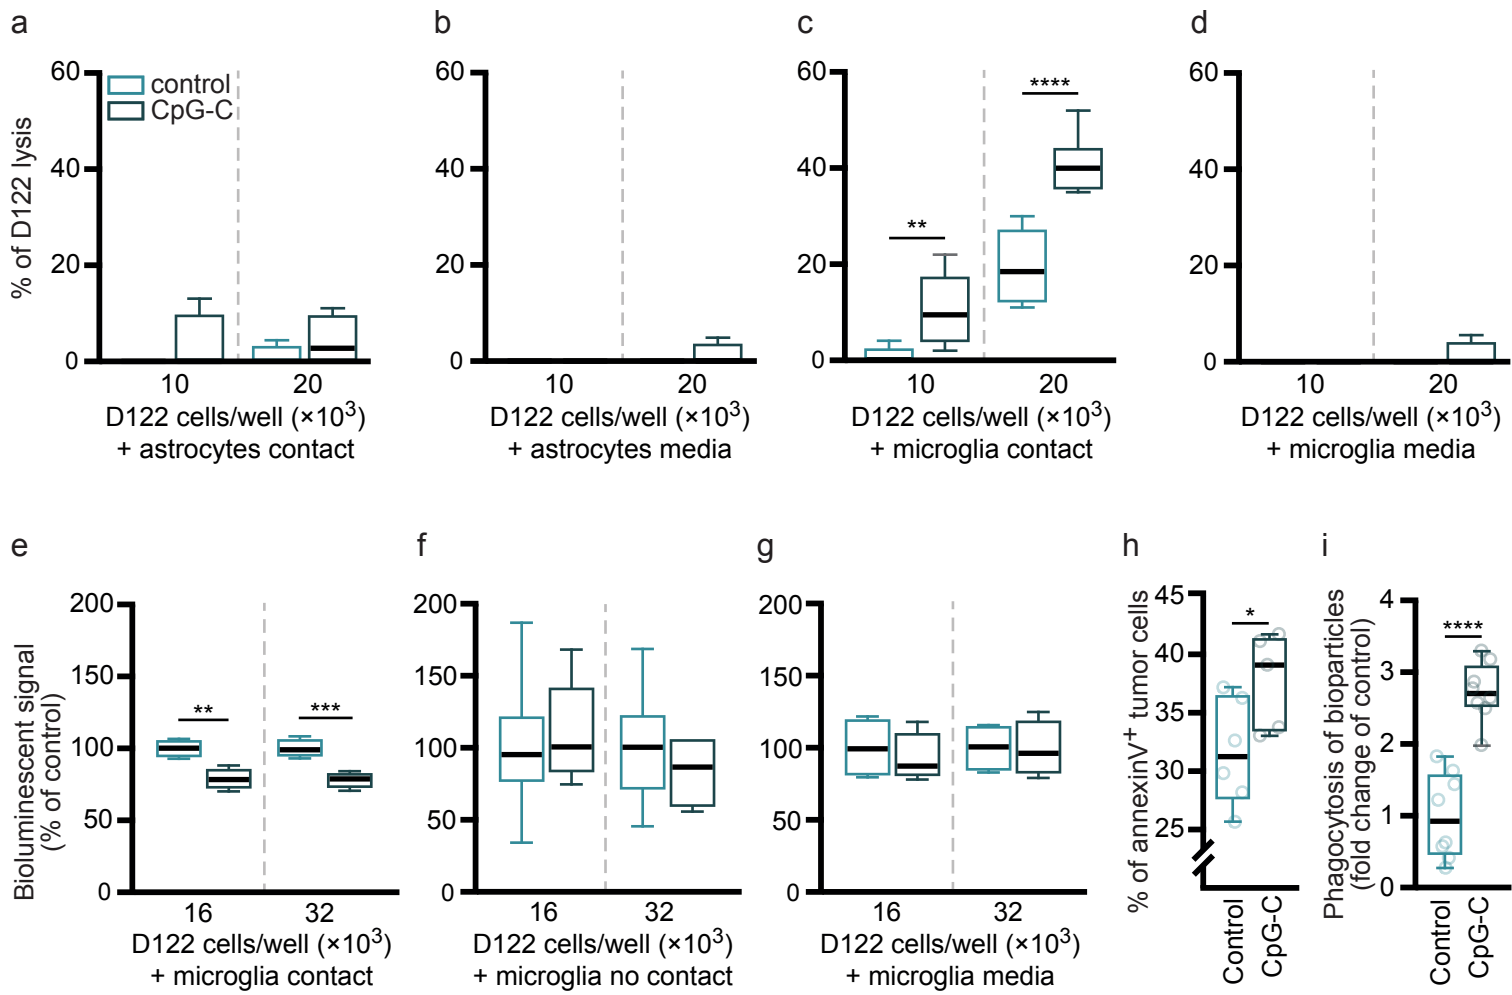

Figure 5 - Benbenishty et al.

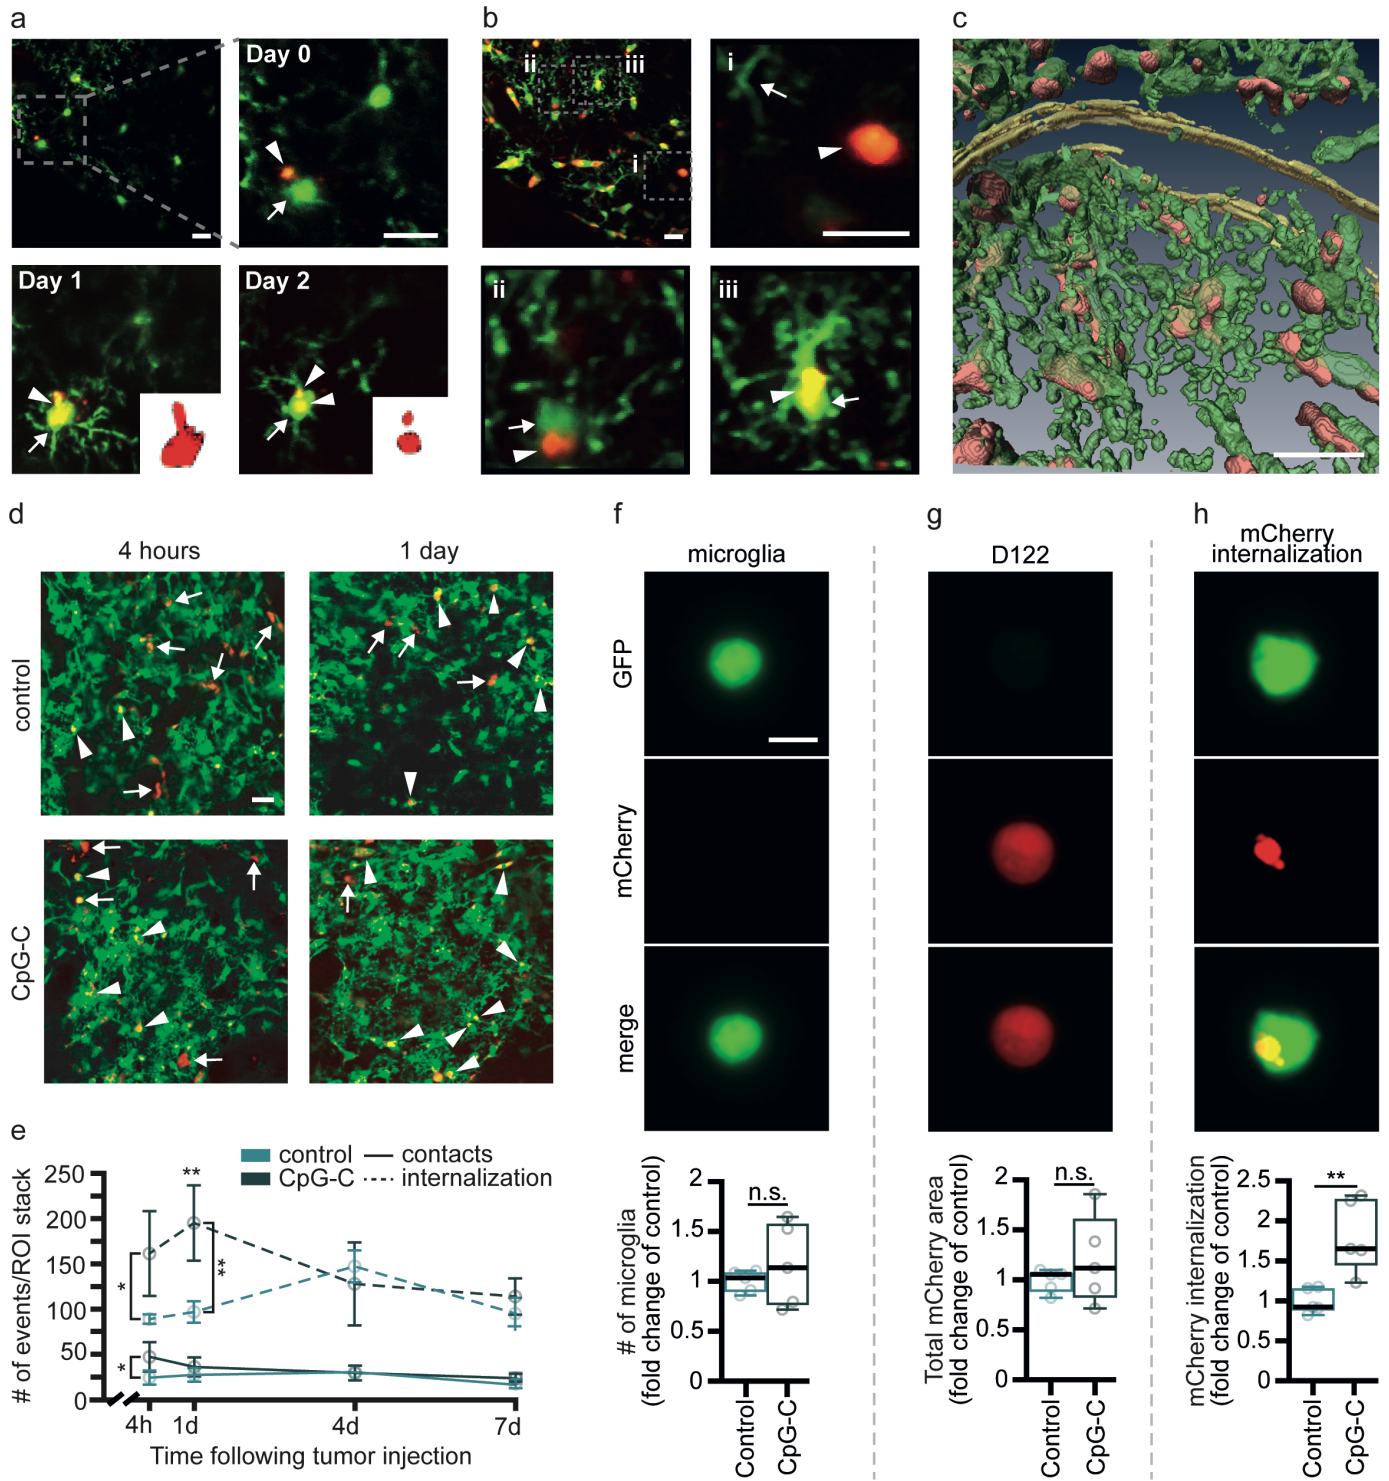

Figure 6 - Benbenishty et al.

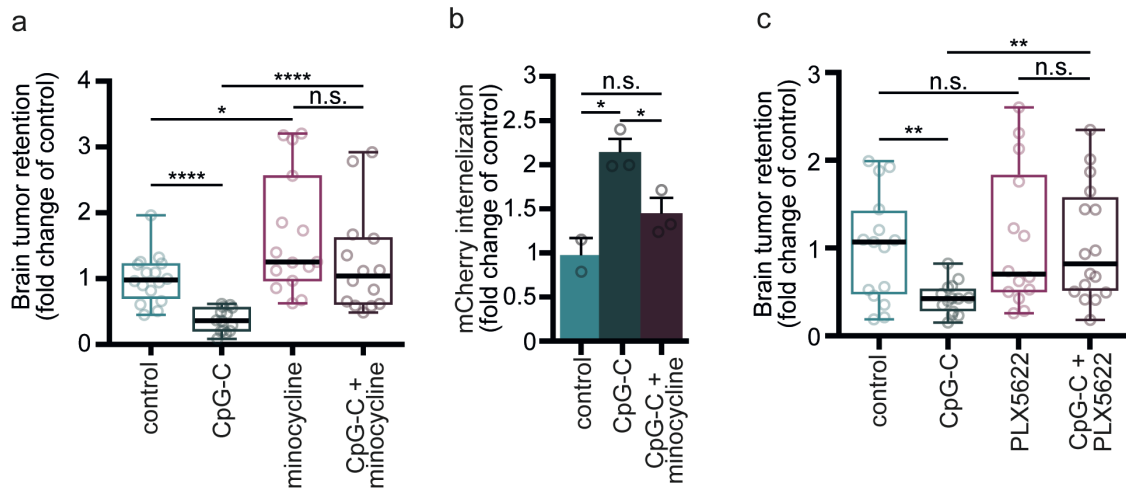

Figure 7 - Benbenishty et al.



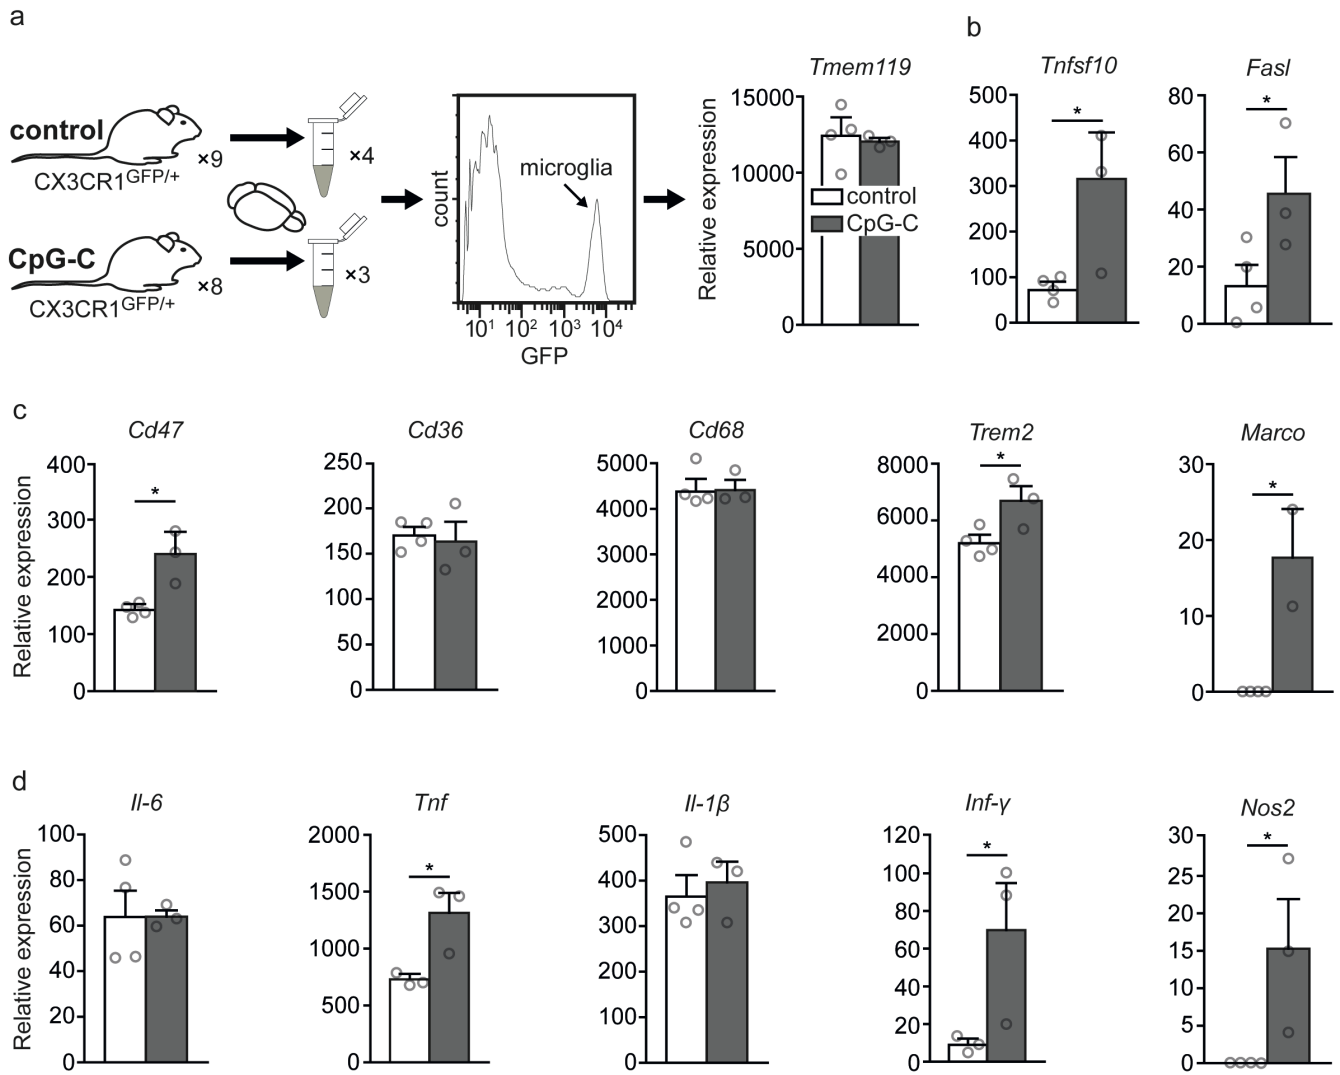

Figure 8 - Benbenishty et al.



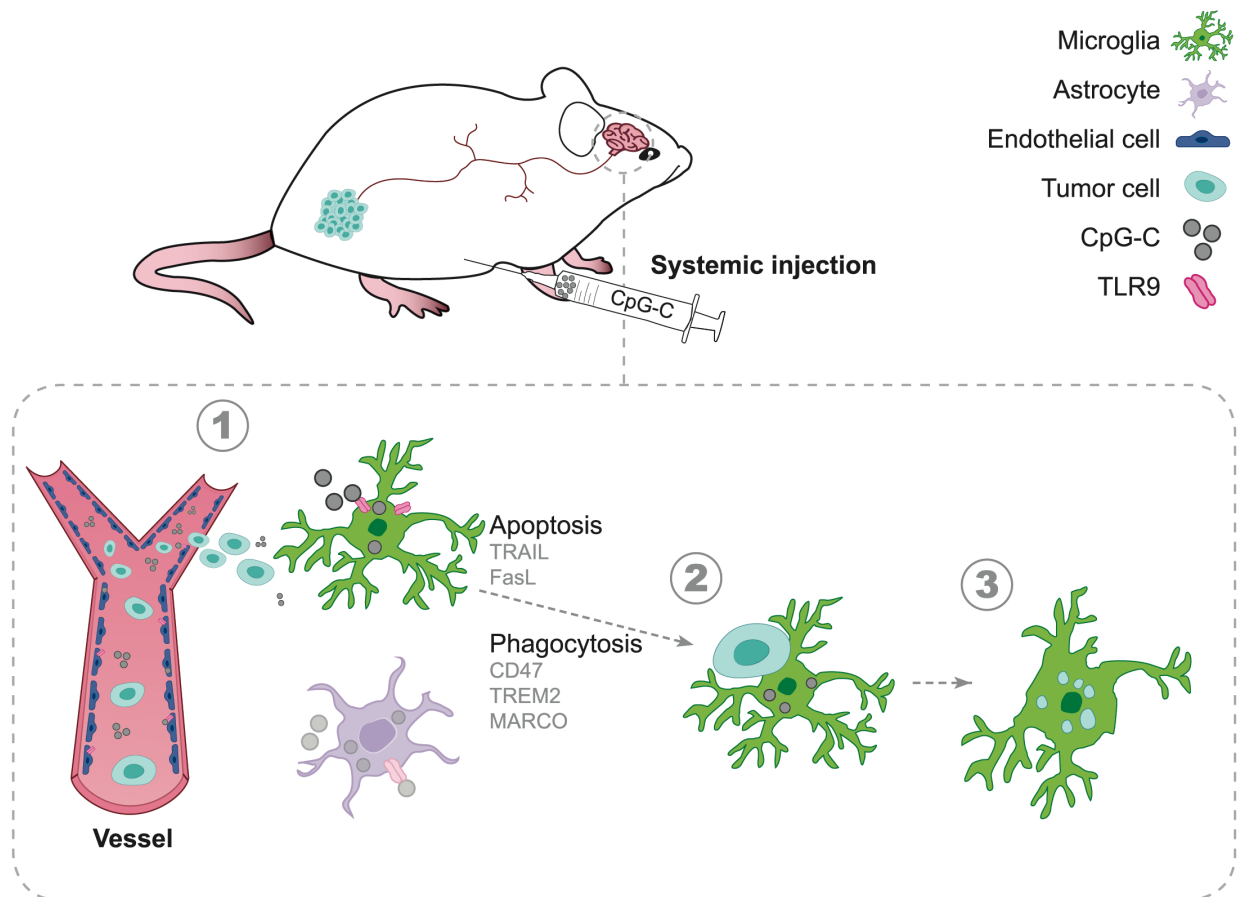

Figure 9 - Benbenishty et al.

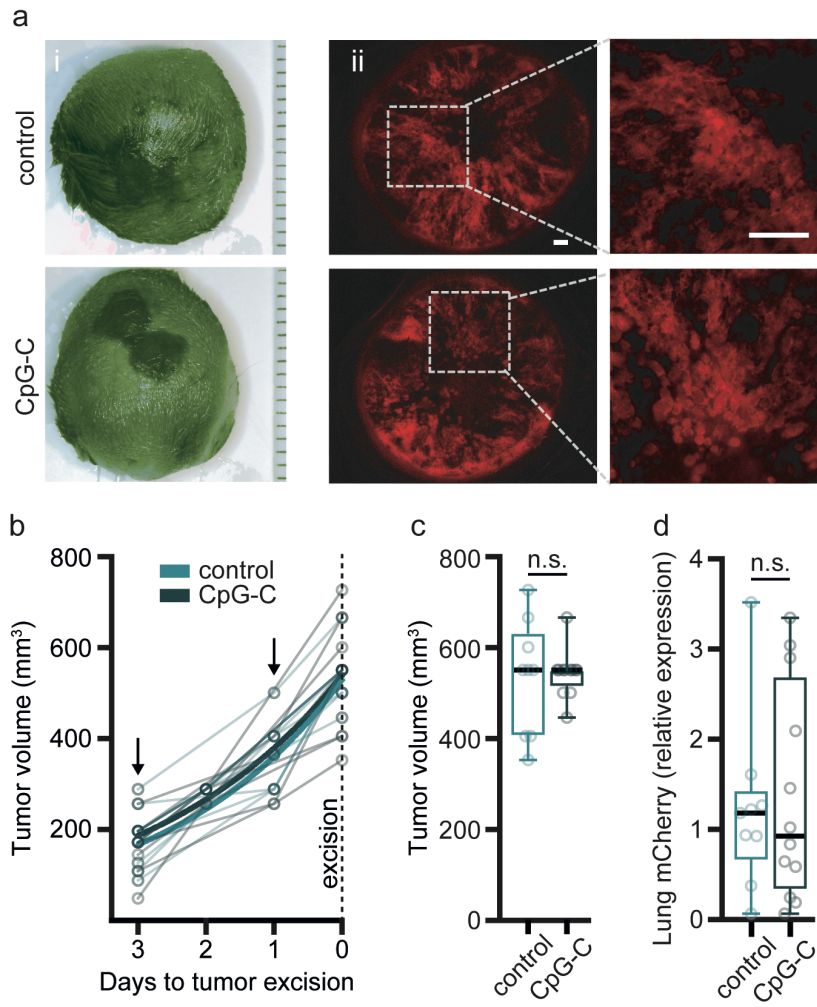

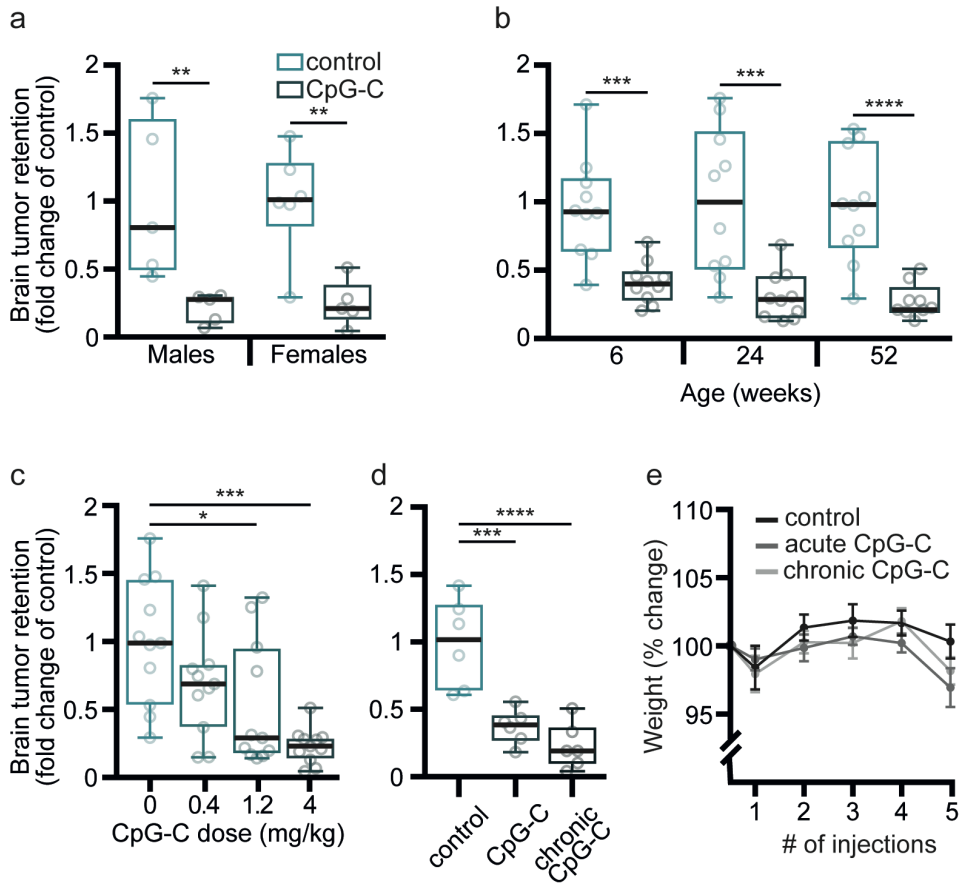

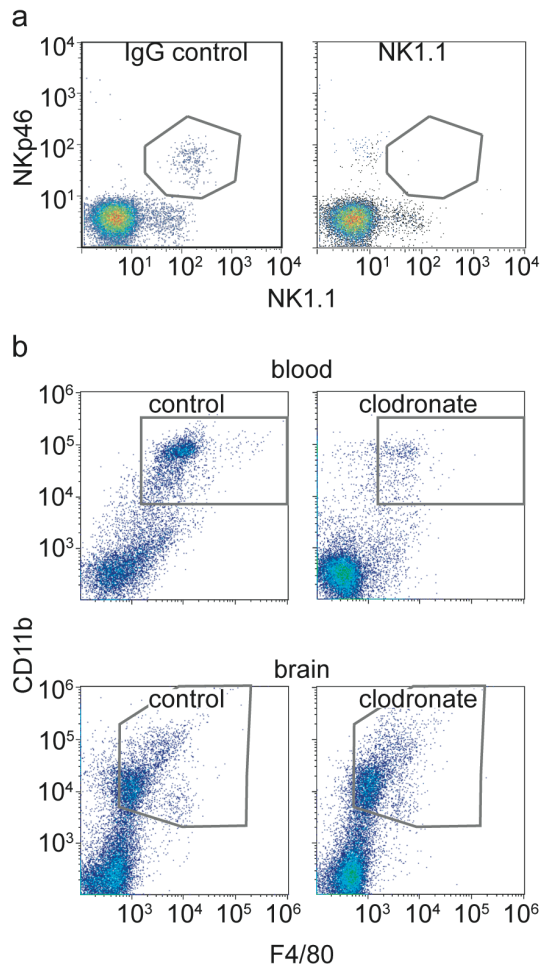

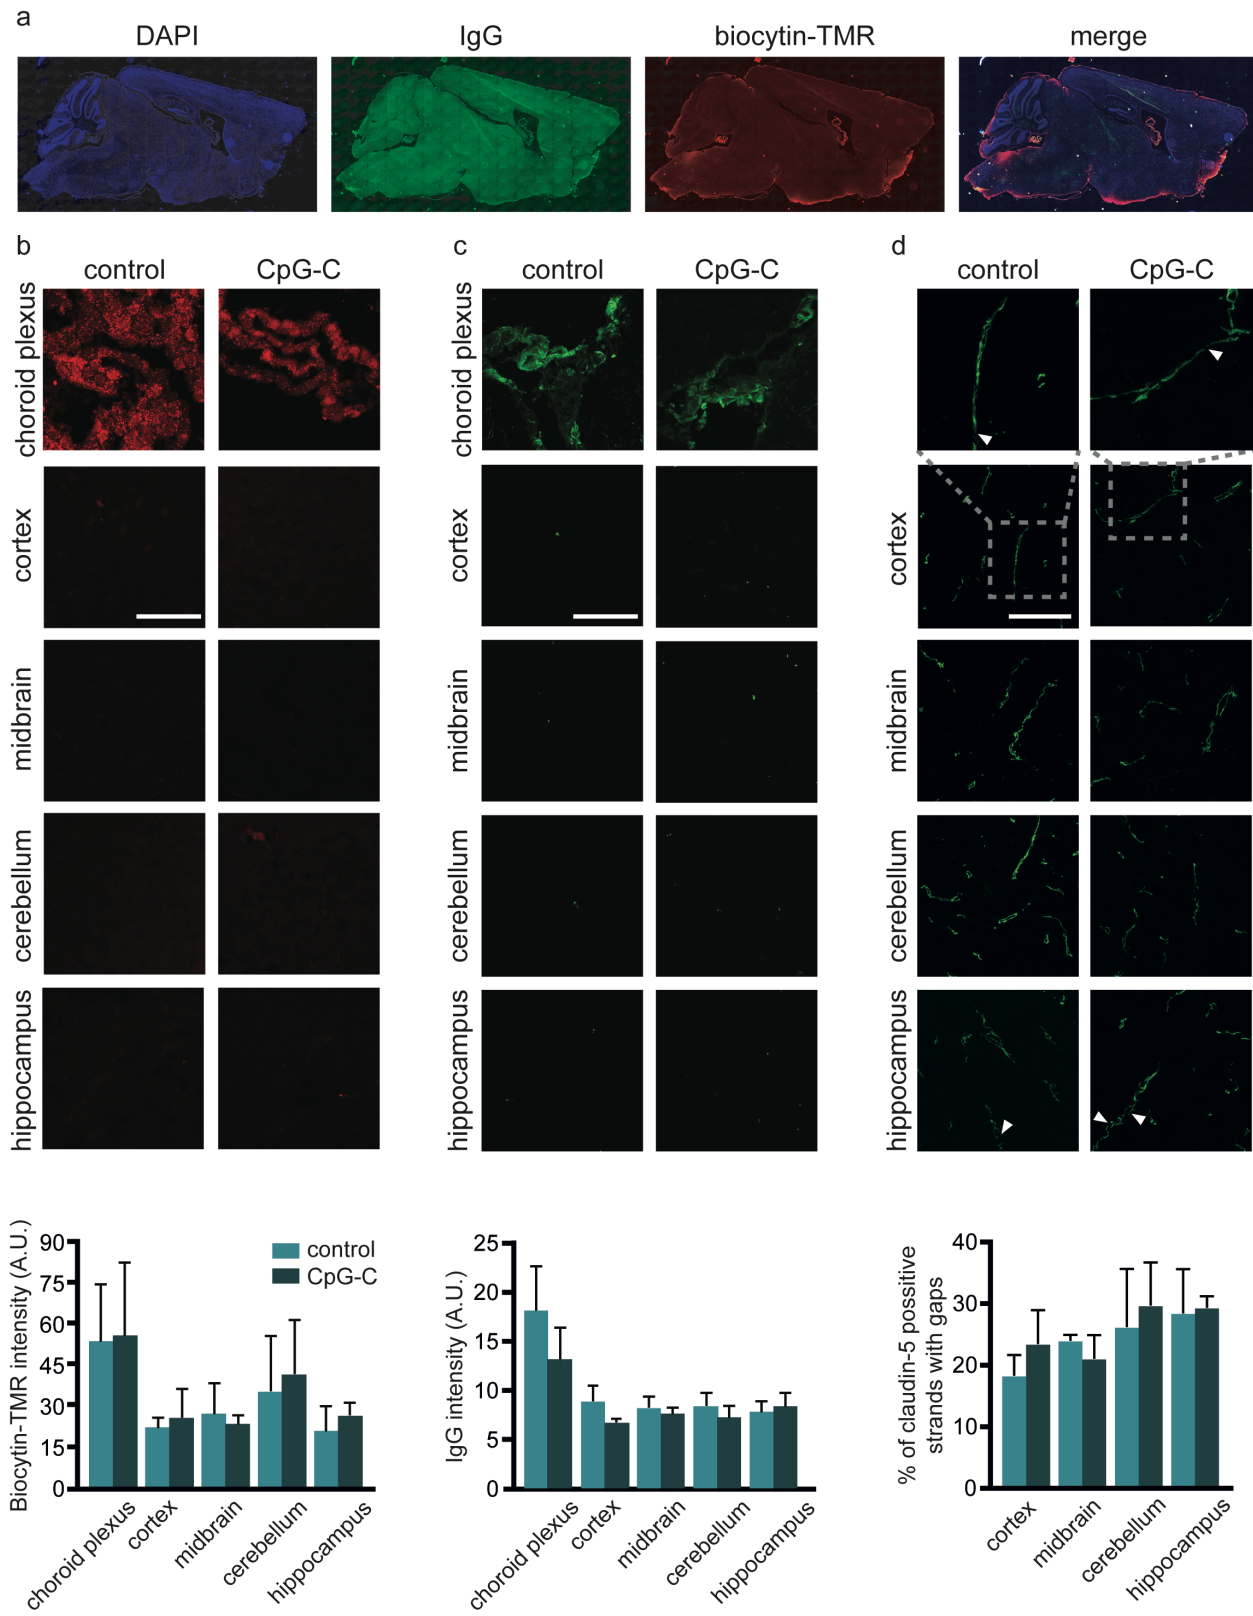

a

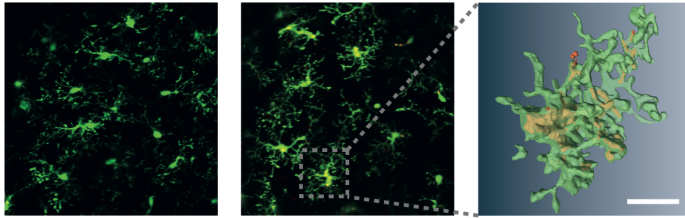

b

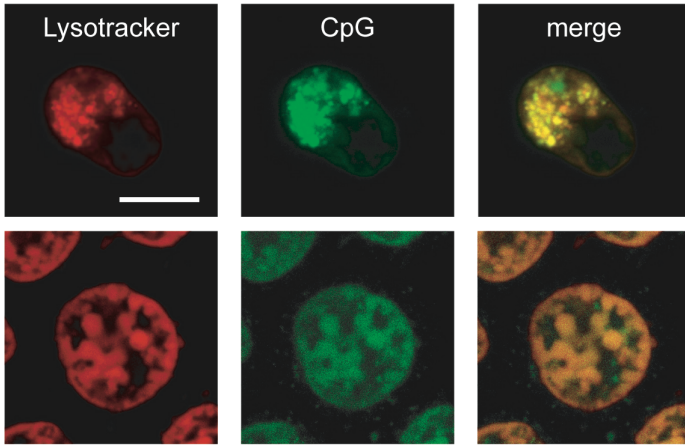



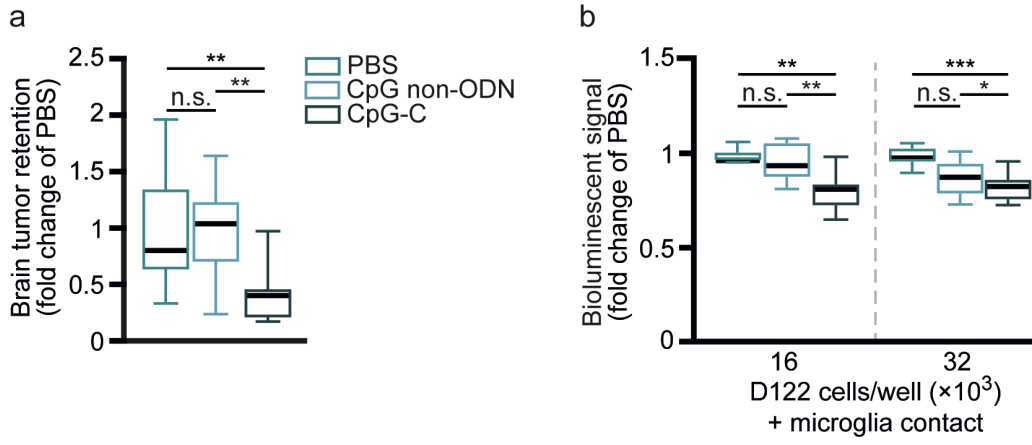

a

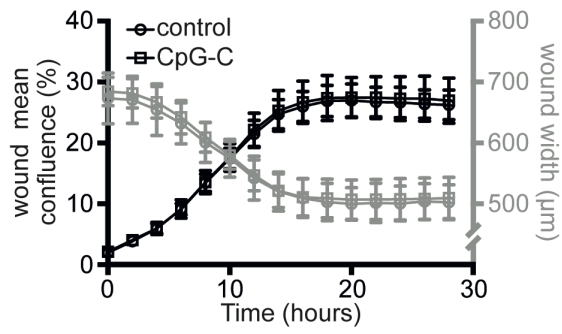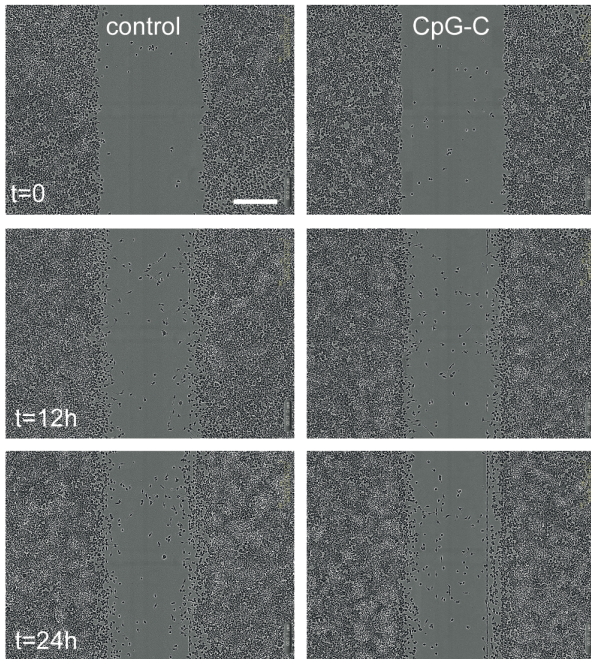

b

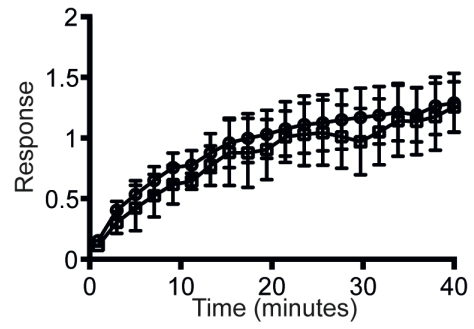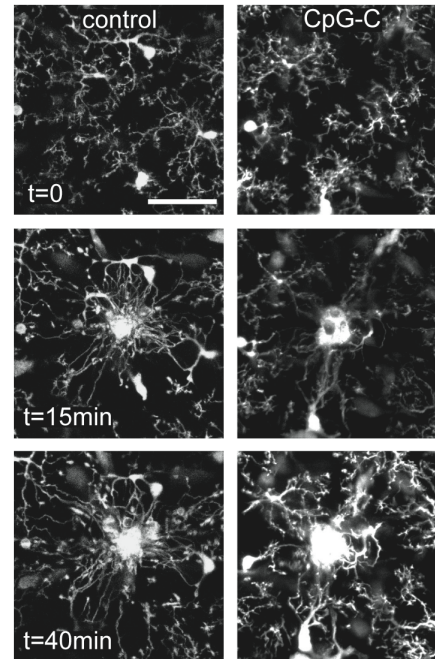

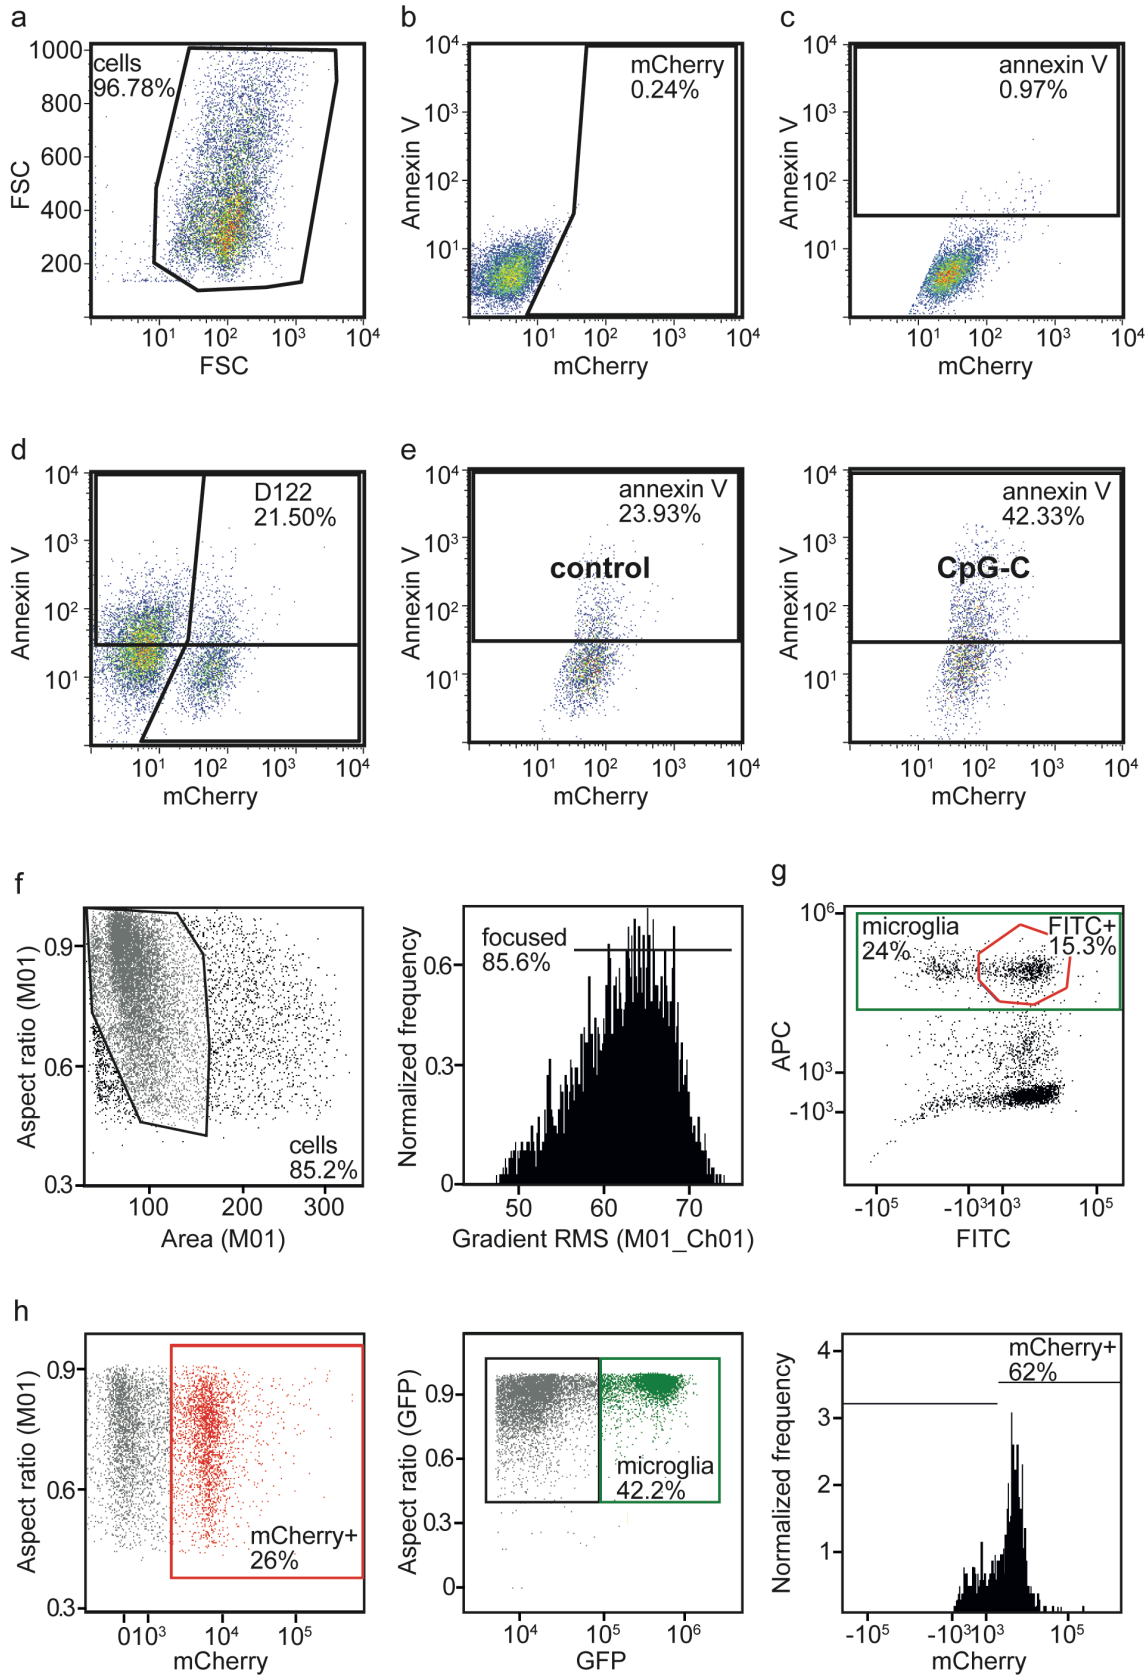

Source: https://www.biorxiv.org/content/10.1101/533927v1.full.pdf
